1 **Category:**

2 Ecology

3

4 **Title:**

5 The influence of feeding behaviour and temperature on the capacity of mosquitoes to transmit malaria

6

7 **Authors:**

8 Eunho Suh\*<sup>†</sup>, Marissa K. Grossman<sup>†</sup>, Jessica L. Waite<sup>†§</sup>, Nina L. Dennington<sup>†</sup>, Ellie Sherrard-Smith<sup>‡</sup>,

9 Thomas S. Churcher<sup>‡</sup>, and Matthew B. Thomas<sup>†</sup>

10

11 **Affiliations:**

12 <sup>†</sup>Center for Infectious Disease Dynamics, Department of Entomology, Penn State University, University  
13 Park, PA 16802

14 <sup>§</sup>Current address: Green Mountain Antibodies, PO Box 1283, Burlington, VT 05402

15 <sup>‡</sup>MRC Centre for Global Infectious Disease Analysis, Department of Infectious Disease Epidemiology,  
16 Imperial College London, Norfolk Place, London W2 1PG, UK

17

18 \*Correspondence to be sent to: Eunho Suh, Center for Infectious Disease Dynamics, Department of  
19 Entomology, Penn State University, University Park, PA 16802. email: [eus57@psu.edu](mailto:eus57@psu.edu)

20

21 **Running title:**

22 Thermal ecology of malaria transmission

23

24 **Keywords:**

25 Thermal ecology, diurnal temperature variability, *Anopheles* mosquitoes, *Plasmodium* malaria, biting  
26 behaviour, behavioral resistance, residual transmission

27 **Abstract:**

28 Insecticide-treated bed nets reduce malaria transmission by limiting contact between mosquito vectors  
29 and human hosts when mosquitoes feed during the night. However, malaria vectors can also feed in the  
30 early evening and in the morning when people are not protected. Here, we explored how timing of blood  
31 feeding interacts with environmental temperature to influence the capacity of *Anopheles* mosquitoes to  
32 transmit the human malaria parasite, *Plasmodium falciparum*. We found no effect of biting time itself on  
33 the proportion of mosquitoes that became infectious (vector competence) at constant temperature.  
34 However, when mosquitoes were maintained under more realistic fluctuating temperatures there was a  
35 significant increase in competence for mosquitoes feeding in the evening, and a significant reduction in  
36 competence for those feeding in the morning, relative to those feeding at midnight. These effects appear  
37 to be due to thermal sensitivity of malaria parasites during the initial stages of parasite development  
38 within the mosquito, and the fact that mosquitoes feeding in the evening experience cooling temperatures  
39 during the night, whereas mosquitoes feeding in the morning quickly experience warming temperatures  
40 that are inhibitory to parasite establishment. A transmission dynamics model illustrates that such  
41 differences in competence could have important implications for disease endemicity, the extent of  
42 transmission that persists in the presence of bed nets, and the epidemiological impact of behavioural  
43 resistance. These results indicate the interaction of temperature and feeding behaviour to be a major  
44 ecological determinant of the vectorial capacity of malaria mosquitoes.

## 45 **Introduction**

46 Wide-scale use of long-lasting insecticide-treated bed nets (LLINs) and indoor residual insecticide sprays  
47 (IRS) has led to substantial declines in the global burden of malaria in recent years<sup>1</sup>. However, these gains  
48 are now threatened by the evolution of insecticide resistance<sup>2-4</sup>. Studies from many locations demonstrate  
49 both target site and metabolic resistance to be widespread in malaria vector populations<sup>2-4</sup>. In addition,  
50 there are growing reports of behavioural resistance, such as changes in mosquito biting behaviour (i.e.  
51 “anti-insecticide” behaviour), which reduce the probability of insecticide encounter and/or attenuate the  
52 efficacy of insecticides<sup>5-8</sup>.

53 In principle, physiological mechanisms of resistance can be countered by switching classes of  
54 insecticide, or using synergists to disrupt detoxification mechanisms<sup>9-13</sup>. However, behavioural resistance  
55 is potentially more insidious since changes in biting time (e.g. early evening biting before humans are  
56 protected under bed nets) and/or shifts in biting location (outdoor biting rather than indoors) could render  
57 whole classes of vector control tools ineffective<sup>5-8,14</sup>. Furthermore, even in the absence of behavioural or  
58 physiological resistance, typical biting patterns for many malaria vectors still span periods of the evening  
59 and morning, when effective coverage of bed nets is less<sup>15,16</sup>. This crepuscular biting behaviour  
60 contributes to ‘residual transmission,’ which is defined as the transmission that persists after achieving  
61 full universal coverage with an effective intervention such as LLINs, to which local vector populations  
62 are fully susceptible<sup>15-17</sup>.

63 Vector competence describes the ability of an arthropod to become infected, allow replication,  
64 and ultimately transmit a pathogen<sup>18</sup>. In order to become transmissible, malaria parasites go through  
65 multiple developmental stages within the mosquito, progressing from the gametocytes ingested in the  
66 blood meal, to gametes, the fertilized zygotes, the motile ookinetes that invade the mosquito midgut, the  
67 oocyst in which the parasite undergoes replication, and finally to the sporozoites that invade the salivary  
68 glands and can be passed onto a new host during a subsequent blood meal<sup>19,20</sup>. Competence is determined  
69 by both genetic and environmental factors<sup>18,21</sup>. Mosquito gene expression is known to follow circadian  
70 rhythms<sup>22-24</sup>. Further, temperatures in many malaria endemic areas exceed 30°C as temperatures fluctuate

71 during the day<sup>25-28</sup>, and early parasite infection is known to be sensitive to high temperatures<sup>29,30</sup>. These  
72 extrinsic and intrinsic factors could have direct or indirect effects on parasite survival and establishment  
73 and hence, contribute to variation in competence of mosquitoes feeding at different times of the day<sup>23,29-31</sup>.  
74 Understanding any such variation is key to fully understanding transmission ecology.

75 Here, we explore the effect of time-of-day of feeding on vector competence of *Anopheles*  
76 mosquitoes to determine whether all mosquitoes are equally capable of transmitting malaria, and to better  
77 understand the potential epidemiological consequences of shifts in feeding behaviour. First, we review  
78 recent literature to characterise biting activity of *Anopheles* mosquitoes in the field. We find many  
79 examples indicating peak biting to occur in the evening or morning rather than the middle of the night, as  
80 well as evidence to suggest recent changes in biting time following wide-scale distribution of bed nets.  
81 We next use a series of laboratory infection studies to examine whether timing of blood feeding affects  
82 vector competence, considering both intrinsic (circadian) and extrinsic (temperature) factors. We find that  
83 while there is little apparent effect of circadian rhythm alone, diurnal temperature fluctuation leads to a  
84 significant increase in the vector competence of evening biting mosquitoes, but a decrease for morning  
85 biting mosquitoes. To explore the possible epidemiological implications of this variation in competence  
86 we use a mathematical model of malaria transmission. This model analysis suggests that differences in  
87 vector competence associated with the interaction of temperature and mosquito biting behaviour could  
88 have a noticeable impact on disease endemicity, and alter the relative efficacy of LLINs. Finally, we  
89 conduct a further set of experiments to begin to elaborate on the mechanisms underpinning the variation  
90 in competence and to determine whether the effects might be mitigated by mosquito thermal behaviour.  
91 These experiments suggest that the changes in vector competence are associated with high thermal  
92 sensitivity of the parasites during the initial infection process, and are likely robust as mosquitoes appear  
93 behaviourally unresponsive to temperatures that are critically damaging to parasite establishment.  
94 Overall, our results suggest the interaction of biting time and temperature to be a major ecological driver  
95 of vectorial capacity.

96

## 97 **Results**

### 98 **Daily biting activity of malaria mosquitoes**

99 We reviewed the contemporary malaria control literature published between 2000 and 2017 using  
100 PubMed to examine the biting activity of *Anopheles* mosquitoes. The goal of this study was to  
101 characterise biting activity of mosquitoes during the period in which the use of LLINs in sub-Saharan  
102 Africa was scaled up substantially<sup>1</sup>. We identified 270 papers that referred to biting time of malaria  
103 vectors, with 42 papers providing measures of hourly biting activity. Peak biting time of most malaria  
104 vectors is generally considered to occur around 00:00-04:00h<sup>15,32</sup> and from these 42 papers, we identified  
105 78 cases where biting conformed to this conventional pattern (Supplementary Table 1 and Supplementary  
106 Table 2). However, we identified 64 cases indicating a peak in biting time to occur before 22:00h  
107 (evening biting) and 9 cases indicating a peak in biting after 05:00h (morning biting) (Supplementary  
108 Table 1 and Supplementary Table 2). In about one third of those papers reporting evening or morning  
109 biting time, there was a suggestion of behavioural change in response to the use of LLINs. Further, a  
110 number of these papers reported measures of prevailing environmental temperature. In the majority (N =  
111 21), the mean temperatures were 25°C or above (overall mean = 26.9°C), while the remainder (N = 12)  
112 had a lower mean of 21.4°C (Supplementary Table 1). There were significantly more cases of evening  
113 biting than morning biting overall (Chi-square test,  $LR-\chi^2 = 46.68$ ,  $df = 1$ ,  $P < 0.0001$ ) regardless of  
114 temperature group (Fisher's exact test,  $P = 0.171$ ) (Supplementary Table 2).

115

### 116 **Effects of biting time and diurnal fluctuating temperature on vector competence**

117 Having confirmed the potential for both morning and evening biting (including in major malaria vectors),  
118 we conducted a series of experiments to investigate whether biting time affected the potential for malaria  
119 vectors to become infected with the human malaria parasite, *Plasmodium falciparum*. Specifically, we  
120 aimed to determine the influence of both intrinsic (circadian) and extrinsic (diurnal temperature  
121 fluctuation) effects on measures of infection prevalence and intensity. We focused on the warmer  
122 temperature conditions as these were the most common in our literature search, are representative of high

123 transmission settings, and are typical of conditions used in the majority of lab-based studies exploring  
124 human malaria-mosquito interactions. Accordingly, experiments were run on a 12:12h light:day cycle at  
125 either constant 27°C, or a more realistic mean temperature of 27°C with a Diurnal Temperature Range  
126 (DTR) of 10°C. Diurnal temperature ranges of 5-20°C are common across many malaria transmission  
127 settings<sup>25,33,34</sup> and so DTR of 10°C is a representative intermediate value. Adult female mosquitoes of the  
128 African malaria vector, *A. gambiae*, were given infected blood meals at one of three times of the day to  
129 capture the range of potential feeding times from the evening through to the morning: 18:00h, 00:00h, or  
130 06:00h. These times of day equate to Zeitgeber Times of ZT12, ZT18 and ZT0, respectively, where ZT0  
131 refers to the beginning of the daylight cycle. For these time-of-day experiments, mosquitoes were  
132 maintained in separate incubators in which the timers were offset so that the actual feeds took place  
133 simultaneously using the same parasite culture, but the mosquitoes were at different points in their diel  
134 cycle. Note also that for the temperature fluctuation treatments, the mosquitoes were fed at 27°C, and then  
135 returned to their individual incubators to follow their particular diurnal thermal trajectories  
136 (Supplementary Fig. 1; see later discussion).

137 We found significant interactions between temperature and time-of-day on different measures of  
138 infection (oocyst intensity: Generalized Linear Mixed effects Model [GLMM],  $F = 17.36$ ,  $df = 2$ ,  $P <$   
139  $0.0001$ ; oocyst prevalence: GLMM,  $F = 18.64$ ,  $df = 2$ ,  $P < 0.0001$ ; sporozoite prevalence: GLMM,  $F =$   
140  $16.19$ ,  $df = 2$ ,  $P < 0.0001$ ; Supplementary Table 3). Under the constant temperature regime there was no  
141 effect of time-of-day on oocyst intensity (i.e. number of oocyst in the midgut of infected mosquitoes),  
142 oocyst prevalence (i.e. proportion of mosquitoes infected), or sporozoite prevalence (i.e. proportion of  
143 mosquitoes with sporozoites in their salivary glands and hence, potentially infectious) (post-hoc contrasts,  
144  $P > 0.05$ ; Fig. 1). In contrast, under more realistic fluctuating temperatures, there was a significant effect  
145 of time-of-day on oocyst intensity, oocyst prevalence, and most importantly, sporozoite prevalence (post-  
146 hoc contrasts,  $P < 0.05$ ; Fig. 1). Each of these infection measures was highest in mosquitoes fed at 18:00h  
147 (ZT12) and lowest in those fed at 06:00h (ZT0) (Fig. 1). For the 06:00h treatment, there was an  
148 approximate 98% reduction in sporozoite prevalence relative to the 18:00h treatment, with <1% of

149 mosquitoes potentially able to transmit parasites. In addition, oocyst intensity and sporozoite prevalence  
150 was also lower in the 00:00h (ZT18) treatment compared to both the 18:00h (ZT12) treatment in the  
151 fluctuating temperature regime, and 00:00h (ZT18) in the constant temperature regime (post-hoc  
152 contrasts,  $P < 0.05$ ; Fig. 1).

153         These results were corroborated for a second mosquito species, the Asian vector *A. stephensi*, in  
154 two separate infection experiments. In the first experiment, which followed the same experimental design  
155 described above, we found significant interaction between temperature and time-of-day on oocyst  
156 intensity (GLMM,  $F = 13.23$ ,  $df = 2$ ,  $P < 0.0001$ ) and sporozoite prevalence (Generalized Linear Model  
157 [GLM],  $LR-\chi^2 = 14.08$ ,  $df = 1$ ,  $P < 0.001$ ; Supplementary Table. 4). Consistent with the results for *A.*  
158 *gambiae*, under the constant temperature regime there was no effect of time-of-day on oocyst intensity,  
159 oocyst prevalence, or sporozoite prevalence (post-hoc contrasts,  $P > 0.05$ ; Supplementary Fig. 2a). In  
160 contrast, under more realistic fluctuating temperatures, there was a significant effect of time-of-day on  
161 oocyst intensity, and more importantly, sporozoite prevalence (post-hoc contrasts,  $P < 0.05$ ;  
162 Supplementary Fig. 2a). In the second experiment, we used a simplified design to provide a basic contrast  
163 between feeding in the evening (18:00h [ZT12]) vs morning (05:00h [ZT23]), under both constant and  
164 fluctuating temperatures. We found significant interactions between temperature and time-of-day on  
165 different measures of infection (oocyst intensity: GLM,  $LR-\chi^2 = 4.78$ ,  $df = 1$ ,  $P = 0.029$ ; oocyst  
166 prevalence: GLM,  $LR-\chi^2 = 16.51$ ,  $df = 1$ ,  $P < 0.0001$ ; sporozoite prevalence: GLM,  $LR-\chi^2 = 7.38$ ,  $df = 1$ ,  $P$   
167  $= 0.007$ ; Supplementary Table 5). Again, oocyst intensity, and oocyst and sporozoite prevalence were not  
168 affected by time-of-day at constant 27°C (post-hoc contrasts,  $P > 0.05$ ; Supplementary Fig. 2b), but all  
169 were significantly reduced when mosquitoes were fed in the morning under 27°C with a DTR of 10°C,  
170 compared with both the evening and morning feeds at constant temperatures (post-hoc contrasts,  $P <$   
171  $0.05$ ; Supplementary Fig. 2b).

172

173 **Effect of altered vector competence on malaria transmission potential**

174 Our initial experiments suggest the potential for biting time to alter vector competence when daily  
175 temperatures fluctuate. To further explore the significance of these findings, we used a deterministic  
176 version of a transmission dynamics model of malaria<sup>35-38</sup> to illustrate the potential public health  
177 implications of changes in vector competence in the context of LLIN use. First, we examined the effects  
178 of differences in vector competence alone on malaria prevalence, considering feeding distribution for an  
179 anthropophilic and anthropophobic vector where most bites happen at midnight and indoors (i.e. 70% at  
180 midnight and 30% in the evening and morning<sup>39</sup>), and illustrative scenarios where biting is skewed  
181 towards the evening (70% in the evening and 30% at midnight), or towards the morning (70% in the  
182 morning and 30% at midnight). Model predictions indicate no effect of biting time on malaria prevalence  
183 when all mosquitoes are equally competent (Fig. 2a and Supplementary Table 6). Similarly, when biting  
184 is centred around midnight there appears little effect of variation in vector competence (i.e. predicted  
185 malaria prevalence is almost identical whether competence differs between mosquitoes or not) (Fig. 2a  
186 and Supplementary Table 6). However, variation in competence leads to an increase in equilibrium  
187 infection prevalence if feeding is dominated by evening biting mosquitoes and a reduction in prevalence  
188 if feeding is dominated by morning biting (Fig. 2a and Supplementary Table 6). We next simulated the  
189 effects of LLINs assuming nets to be used by 50% of the population (approximating mean net use by  
190 children across sub-Saharan Africa<sup>40</sup>) and that contact rate with nets was the same for all mosquitoes  
191 regardless of biting time. LLINs reduced infection prevalence in all cases, but the relative efficacy is  
192 lower when biting is skewed towards the evening and greater when biting is skewed towards the morning,  
193 even when we assumed equivalent exposure to the LLINs for the different feeding behaviours (Fig. 2b  
194 and Supplementary Table 6). When we included the fact that evening and morning biters will likely  
195 experience reduced contact with LLINs (in the model, we halve the probability that biting takes place  
196 when people are in bed for the evening or morning biters), malaria prevalence increased overall, but the  
197 skew to evening biting resulted in the greatest prevalence and the lowest relative effectiveness of LLINs  
198 (Fig. 2c and Supplementary Table 6).

199



## 200 **Mechanistic effects of temperature fluctuation on vector competence**

201 In order to better understand the influence of temperature fluctuation on vector competence, we  
202 conducted a series of experiments to determine the thermal sensitivity of malaria parasite establishment.  
203 The focus on initial parasite establishment is justified since it is only during the initial 24h following  
204 feeding that mosquitoes experience different conditions (i.e. they follow different short-term thermal  
205 trajectories as feeding occurs at different points on the fluctuating cycle) and conditions experienced in  
206 subsequent days are essentially identical. First, we examined the effects of absolute temperature by  
207 feeding *A. gambiae* and *A. stephensi* infected blood and maintaining them under constant temperatures of  
208 27°C (control), 30°C, or 32°C, to test whether these higher temperatures were detrimental to parasite  
209 infections as temperature rise to >32°C during the day cycle of the 27°C DTR10°C regime. We observed  
210 a decline in overall oocyst intensity (GLM,  $LR-\chi^2 = 78.7$ ,  $df = 1$ ,  $P < 0.0001$ ) and oocyst prevalence  
211 (GLM,  $LR-\chi^2 = 36.9$ ,  $df = 1$ ,  $P < 0.0001$ ) at 30°C relative to 27°C for both mosquito species, while no  
212 oocyst infections were observed at 32°C (Fig. 3a and Supplementary Table 7). These data indicate that  
213 parasite establishment is constrained at temperatures that exceed 30°C. Next, we examined the  
214 importance of duration of exposure to high temperatures by varying the period of incubation at the  
215 permissive temperature of 27°C from 3 to 48h post blood meal, before moving mosquitoes to the more  
216 constraining temperature of 30°C, to test whether the earlier stage of parasite infection in particular is  
217 sensitive to high temperatures. In this case, overall infection levels were low because the parasite culture  
218 had unexpectedly low gametocytemia. Nonetheless, we found that incubating at 27°C for 12 to 24h led to  
219 a progressive recovery in oocyst intensity and oocyst prevalence rendering the infections statistically not  
220 different to those observed in a cohort maintained at 27°C (post-hoc contrasts,  $P > 0.05$ ), while those  
221 mosquitoes transferred to 30°C before 12h showed no infections (Fig. 3b), indicating higher thermal  
222 sensitivity of early infection (i.e. < 12h post infection).

223 An additional observation is that the effects of high temperature appear to vary to some extent  
224 with oocyst intensity (and so depend on the level of gametocytemia in the blood meal). For example, the  
225 data presented in Fig. 3a had the highest baseline intensities amongst our various experiments and in this

226 case, reduction in oocyst prevalence at 30°C was not as high as when the baseline intensity was lower.  
227 To test the hypothesis that the negative effects of exposure to high temperature on parasite establishment  
228 depend on infection intensity, we fed *A. gambiae* blood meals containing four different dilutions (1, 1/2,  
229 1/4, or 1/10) of gametocytes to generate a range of infection loads, and then kept them at 27°C or 30°C.  
230 At 27°C, the oocyst prevalence varied from 84 to 52% across the dilution treatments, with median oocyst  
231 intensities ranging from nine down to one per mosquito (Supplementary Fig. 3a). Incubation at 30°C  
232 reduced oocyst intensity and prevalence across the board (oocyst intensity: GLM,  $LR-\chi^2 = 5.96$ ,  $df = 1$ ,  $P$   
233  $= 0.015$ ; oocyst prevalence: GLM,  $LR-\chi^2 = 138$ ,  $df = 1$ ,  $P < 0.0001$ ; Supplementary Table 8). However,  
234 the per cent reduction in oocyst prevalence was 73% in the highest oocyst intensity treatment and  
235 increased up to 96% in the lowest intensity treatment (Supplementary Fig. 3a). Furthermore, when we  
236 plot per cent reduction in oocyst prevalence due to high temperature against mean number of oocysts per  
237 mosquito for each of our experiments, we find that the impact of temperature declines as intensity of  
238 infection increases (Supplementary Fig. 3b).

239

#### 240 **Potential confounders**

241 There are a number of potential confounders that could impact the robustness of our results. For example,  
242 we assume that in a fluctuating temperature environment, mosquitoes will generally track ambient  
243 temperature and not exhibit strong thermoregulatory behaviours that might limit exposure to the critical  
244 temperatures that impact parasite establishment. In order to investigate this, we adapted methods from a  
245 previous study<sup>41</sup> to examine the thermal avoidance behaviour of *A. gambiae* following a blood meal at  
246 06:00h that is either infected or uninfected. The approach exposes mosquitoes to temperatures that ramp  
247 gradually from 28 to >35°C and monitors the time point at which mosquitoes escape the warmed  
248 microenvironment (Fig. 4a). We found no evidence that mosquitoes were sensitive to temperatures of 30-  
249 32°C and only observed a thermal escape response as temperatures approached 35°C (Fig. 4b). There  
250 were no differences between infected and uninfected mosquitoes in escape response (Log-rank test;  $\chi^2 =$

251 1.25,  $df = 1$ ,  $P = 0.264$ ) (dissection of mosquitoes from this experiment revealed oocyst prevalence of 60-  
252 75% with 5.5-9 median oocyst intensity).

253 Additionally, in our experiments the blood meal was administered at the mean temperature of  
254 27°C before mosquitoes were returned to their respective temperature treatments. This was done to  
255 standardise blood feeding compliance and hence the proportion of mosquitoes acquiring parasites (note,  
256 blood feeding frequency exceeded 95% in all experiments). It is also technically challenging to blood-  
257 feed mosquitoes at different ambient temperatures for different temperature treatment groups using the  
258 same parasite culture at the same time. In reality, mosquitoes have to feed at the prevailing ambient  
259 temperatures. However, these prevailing temperatures for the different feeding times in the 27°C DTR  
260 10°C regime vary from 22.6 to 28.5°C, so it is unlikely that these modest temperature differences would  
261 impact feeding compliance or efficiency, especially when the blood meal itself is at 37°C and this has a  
262 marked effect on mosquito body temperature during the feeding process<sup>42,43</sup>. To provide some  
263 confirmation of this, we conducted a simple assay to compare the feeding efficiency of *A. gambiae*  
264 mosquitoes at 21 and 27°C. We found no effect of temperature or its interaction with time-of-day on  
265 feeding compliance (Temperature: GLMM,  $F = 3.05$ ,  $df = 1$ ,  $P = 0.131$ ; Temperature  $\times$  Time-of-day:  
266 GLMM,  $F = 3.98$ ,  $df = 1$ ,  $P = 0.080$ ; Supplementary Table 9 and Supplementary Table 10). Furthermore,  
267 as part of a separate investigation, we have conducted an experiment in which *A. gambiae* adults were  
268 maintained at 21°C, fed at 27°C and then returned to 21°C to test whether transferring mosquitoes  
269 between different temperatures for blood feeding could affect vector competence. We found no difference  
270 in oocyst intensity, or oocyst or sporozoite prevalence between mosquitoes transferred between 21 and  
271 27°C, and those maintained at 27°C throughout (post-hoc contrasts,  $P > 0.05$ ; Supplementary Fig. 4).

272 We also examined whether transfer of mosquitoes at different times of day from their respective  
273 fluctuating temperatures affected subsequent blood meal size at the common feeding temperature of  
274 27°C. Using fresh body weight of blood-fed mosquitoes as a proxy for blood meal size, we found no  
275 difference in body weight between temperature (time-of-day) groups for either *A. gambiae* or *A. stephensi*  
276 (GLMM,  $F = 0.46$ ,  $df = 2$ ,  $P = 0.635$ ; Supplementary Fig. 5; Supplementary Table 11).

277

## 278 **Discussion**

279 In the current study we used a combination of empirical and theoretical approaches to explore whether  
280 mosquitoes feeding at different times of day were equally likely to become infected with malaria parasites  
281 and hence contribute to transmission. The research was motivated by the fact that although most malaria  
282 mosquitoes tend to feed at night, the distribution in biting around the peak means that a proportion of  
283 bites also occur in the evening and the morning. Our analysis of the recent literature indicates that this  
284 crepuscular feeding is widespread (from our review around 50% of cases reporting hourly feeding  
285 behaviour indicated peak biting time either before 10pm or after 5am) and might possibly be increasing as  
286 a behavioural avoidance response to the use of insecticide treated bed nets. This suggestion is consistent  
287 with another recent systematic review, which indicated that on average only 79% of bites by the major  
288 malaria vectors in Africa occur during the time when people are in bed, an estimate substantially lower  
289 than previous predictions<sup>16</sup>. Note also that there are very broad confidence intervals around this estimate,  
290 with 95 percentiles ranging from 33.9 to 97.2% for bites received when people are in bed, depending on  
291 vector species and location<sup>16</sup>.

292 How such feeding behavior influences transmission depends, in part, on whether biting time  
293 affects the capacity of mosquitoes to acquire and successfully incubate the malaria parasite. From a range  
294 of laboratory infection studies, we show that vector competence varies substantially depending on  
295 whether mosquitoes feed in the evening, at midnight, or in the morning. This variation does not appear to  
296 be driven by circadian rhythm of the mosquitoes but rather, an interaction with daily temperature  
297 variation. More specifically, time-of-day of feeding had no significant effect on the proportion of  
298 mosquitoes that successfully developed parasites through to sporozoite stage when mosquitoes were  
299 maintained at constant 27°C. However, when mosquitoes were maintained under conditions representing  
300 more realistic diurnal temperature variation (i.e. 27°C±5°C) there was significant variation in vector  
301 competence, with approximately 55 and 88% of evening biters, 26 and 65% of midnight biters, and 0.8  
302 and 13% of morning biters positive for sporozoites for *A. gambiae* and *A. stephensi*, respectively (Fig. 1

303 and Supplementary Fig. 2a). Consistent with some earlier work<sup>29,30</sup>, our additional experiments suggest  
304 that this pattern results from transient exposure to temperatures  $>30^{\circ}\text{C}$  reducing vector competence via a  
305 negative effect on the initial stages of parasite development. Importantly, mosquitoes feeding in the  
306 morning (i.e. 06:00h [ZT0]) have only 4h before temperatures exceed  $30^{\circ}\text{C}$  under a fluctuating  
307 temperature regime, while those that feed at midnight or in the evening (i.e. 00:00h [ZT18] or 18:00h  
308 [ZT12]) have 10h and 16h at permissive temperatures, respectively (see Supplementary Fig. 6). As the  
309 duration of permissive temperatures increases, so does the probability of parasite establishment.

310 Our illustrative modelling analysis indicates that the differences in vector competence associated  
311 with biting time could have important implications for malaria burden (Fig. 2). In the absence of LLINs,  
312 the variation in vector competence we observe in our empirical studies leads to increased infection  
313 prevalence in the human population when feeding patterns are skewed towards evening biting, and  
314 reduced prevalence when skewed towards morning biting. When biting is distributed symmetrically  
315 around midnight the model suggests negligible effect of variation in competence on prevalence, relative  
316 to predictions based on the standard assumption that all mosquitoes have equal competence. However,  
317 this does not mean that variation in competence is unimportant but rather, that the increased transmission  
318 potential of mosquitoes biting in the evening is more or less counterbalanced by reduced transmission  
319 potential of mosquitoes biting in the morning. LLINs reduce overall infection prevalence, but the impact  
320 of LLINs is less if biting is skewed towards the evening relative to midnight or morning biting, as evening  
321 biters have the greatest vector competence and hence, higher overall transmission. If we further assume  
322 that evening or morning biting mosquitoes escape contact with bednets because people are unlikely to be  
323 in bed and protected by LLINs at these times, the relative efficacy of LLINs is reduced, even if  
324 mosquitoes have equivalent competence (comparing the grey lines with the black lines in Fig 2c provides  
325 an illustration of the impact of behavioural resistance with constant competence). If we include the  
326 additional effect of variable vector competence, the decline in relative efficacy of LLINs is more modest  
327 for morning biters but greater for evening biters. The reason is that if mosquitoes feed in the morning, the  
328 reduced competence of the mosquitoes could compensate for the lower contact rate with LLINs. In the

329 case of morning feeding being a consequence of behavioural resistance, such an effect would represent an  
330 unexpected positive side effect of selection on mosquito life history<sup>44</sup>. On the other hand, if mosquitoes  
331 feed in the early evening, then not only will LLIN contact rate tend to be reduced, but the mosquitoes  
332 could be even more efficient vectors, exacerbating the epidemiological consequences of residual  
333 transmission and/or behavioural resistance.

334 The exact mechanisms underlying the transient thermal sensitivity of parasite establishment  
335 remain unclear. There could be direct negative effects of temperature on parasite biology and/or indirect  
336 effects mediated via the mosquito. Previous research has suggested that an increased blood digestion rate  
337 at higher temperatures could increase the quantity of midgut proteases, potentially reducing ookinete  
338 density in the mosquito midgut<sup>30</sup>. Given the importance of elements of the innate immune response and  
339 certain components of the midgut microbiome in determining susceptibility to infection, it is possible that  
340 these factors could also interact with temperature<sup>45,46</sup>.

341 Our results appear robust to mosquito behaviour as our thermal escape response assay indicated  
342 that mosquitoes are behaviourally unresponsive to temperatures that are critically damaging to malaria  
343 parasite establishment. The limited behavioural response of adults to temperatures of around 32°C is  
344 similar to that reported previously<sup>41</sup>. Moreover, studies comparing the effects of temperature extremes on  
345 *Anopheles* mosquitoes indicate that long-standing laboratory colonies are sufficiently similar in thermal  
346 tolerance to field-collected mosquitoes to provide reasonable surrogates of wild populations<sup>47</sup>. Further,  
347 our feeding compliance and blood meal volume assays suggest that transferring mosquitoes between  
348 temperatures for feeding in our main experiments, likely had little confounding effect.

349 We acknowledge that our study used standard laboratory mosquito and parasite strains, and it is  
350 possible that in field settings, local adaptation could yield different patterns of thermal sensitivity for  
351 parasites in wild type mosquitoes<sup>48</sup>. Previous studies do indicate that infection with *P. falciparum* is  
352 possible above 32°C<sup>49,50</sup>, and there is a suggestion that naturally circulating parasites might exhibit higher  
353 thermal tolerance than standard lab strains<sup>51</sup>. For example, one study using parasite populations from 30  
354 naturally infected children in Kenya found that parasites established in mosquitoes following blood feeds

355 from 50% of the carriers (i.e. blood from 15 of the 30 gametocyte positive children yielded mosquito  
356 infections) when mosquitoes were maintained at 27°C, but this fell to 30% (i.e. mosquito infections from  
357 blood of 8/27 of the children) when mosquitoes were maintained at 32°C<sup>51</sup>. For those feeds that yielded  
358 infections at both temperatures, the mean percentage of mosquitoes infected at oocyst stage was 31% at  
359 27°C and 17% at 32°C. These reductions in frequency of infection and infection prevalence are less  
360 extreme than our data might predict but still indicate a marked impact of temperature. Whether the  
361 differences between studies result from variation in parasite thermal sensitivity between strains, or other  
362 factors, is not known. Our data, together with those of Bradley *et al.*<sup>52</sup> and Pathak *et al.*<sup>53</sup>, suggest  
363 variation in gametocyte densities between feeds/hosts could mediate the effects of temperature on parasite  
364 establishment (i.e. if infection is partly a numbers game, then low gametocyte densities might result in  
365 even lower probability of a successful infection under thermally constraining conditions). There might  
366 also be circadian patterns in the developmental rhythm of parasites<sup>54</sup> and gametocyte infectiousness<sup>23</sup>.  
367 Our experiments used cultured parasites and we found little evidence for circadian effects in the mosquito  
368 in the absence of temperature fluctuation. Recent work on rodent malaria, however, indicates that  
369 gametocytes are less infective in the day than at night, but this reduced infectivity is partly offset by  
370 mosquitoes being more susceptible to infection when they feed during the day<sup>55</sup> (though it should be  
371 noted that neither the mosquito or the rodent species used in these latter studies is the natural host, and the  
372 infection experiments were conducted under constant temperatures). Studies on *P. falciparum* in the field  
373 provide mixed results; some research indicates no difference in infectiousness or density of gametocytes  
374 between day (16:00h) and night (23:00h)<sup>56</sup>, while other research suggests a diel cycle in gametocyte  
375 density with the highest density in the early evening (17:30h) and the lowest in the morning (05:30h)<sup>57</sup>,  
376 which would likely exacerbate the effects we report.

377 In addition to potential biological differences between systems (both lab vs. field, and field vs.  
378 field), how the time-of-day effects impact malaria transmission intensity in the field will likely vary with  
379 prevailing temperatures. If either the mean temperatures or the extent of daily temperature variation limit  
380 exposure to temperatures above 30°C, there might be little impact of biting time. Whether biting time

381 affects competence in conditions representative of the lower temperature environments we identified in  
382 the literature review is the subject of ongoing research. However, there are extensive areas of malaria  
383 transmission in Africa where peak daily temperatures exceed 30°C<sup>25-28</sup>. Furthermore, interactions with  
384 other traits could influence the net impact on transmission. For example, it is generally assumed that  
385 malaria vectors feed at night to exploit sleeping hosts and reduce biting-related mortality<sup>15</sup>. The extent to  
386 which feeding earlier in the evening increases mortality rate or otherwise influences mosquito-to-human  
387 transmission and thus vectorial capacity overall, is unknown. Further mathematical modelling work is  
388 needed to better understand the full implications of the difference in human-to-mosquito transmission,  
389 though it will be impeded by a general lack of knowledge of mosquito behaviour and transmission  
390 ecology<sup>58-60</sup>.

391 All these factors caution against over-extrapolation of our results and point to the need to extend  
392 research to field settings to validate our findings using natural mosquito-parasite pairings. Nonetheless,  
393 the high thermal sensitivity of the early stages of malaria parasite infection is widely observed in diverse  
394 systems, including human (*P. falciparum* and *P. vivax*), rodent (*P. chabaudi* and *P. berghei*), and avian  
395 malaria (*P. relictum*)<sup>29,30,33,61-63</sup>, so there is little reason to think the qualitative effects we report are unique  
396 to our experimental system. As such, we believe our empirical and theoretical findings could have  
397 significant implications for basic understanding of malaria transmission ecology since they suggest that  
398 not all mosquito bites are equivalent and that evening feeding might contribute disproportionately to  
399 vectorial capacity. There is significant interest in how aspects of the innate immune system<sup>64-66</sup>, or factors  
400 such as the midgut microbiome<sup>67-69</sup>, can impact the capacity of mosquitoes to transmit malaria parasites.  
401 In the context of this research, it is noteworthy that ecological factors like daily variation in temperature  
402 and biting time can interact to render the same mosquitoes either highly susceptible, or essentially  
403 refractory. These results are not simply of academic interest as they add important ecological complexity  
404 to understanding the potential significance of residual transmission and behavioural resistance.

405



## 406 **Materials and Methods**

### 407 **Characterization of biting behaviour in *Anopheles* mosquitoes in the literature**

408 We used eight combinatorial search terms composed of ‘biting’, either of ‘malaria’ or ‘Anopheles’, and  
409 one of ‘nets’, ‘bednets’, ‘ITNs’, or ‘LLINs’ in PubMed for identifying literature that provided hourly  
410 biting time data (18:00-06:00h) generated by human landing catch methods or human baited bed net traps.  
411 Publication year was limited to 2000-2017 considering a marked increase for the malaria control efforts in  
412 sub-Saharan Africa since 2000<sup>1</sup>. Conventional peak biting time of *Anopheles* mosquitoes is generally  
413 known to occur between 00:00-04:00h<sup>15,32</sup>, and studies have shown majority of people go to bed at 21:00-  
414 22:00h and get out of bed at 05:00-06:00h<sup>7,70-75</sup>. Accordingly, we considered cases of peak biting time  
415 before 22:00h (i.e. evening biting) or after 05:00h (i.e. morning biting) to be consistent with behavioural  
416 change. A “case” was determined as a mosquito species or species complex for which biting activity had  
417 been determined in a given paper.

418 Temperature data for the studies were either provided directly in the source literature or, if not  
419 presented, monthly mean temperature was estimated for the time (study periods) and location (regional  
420 estimates of study sites) of the study using Global Surface Summary of the Day (GSOD) provided by  
421 National Oceanic and Atmospheric Administration, Department of Commerce  
422 (<https://data.noaa.gov/dataset/dataset/global-surface-summary-of-the-day-gsod>), or Climate-Data.org  
423 (<https://en.climate-data.org>). Temperature measures were categorized into high (25°C or above) and low  
424 (< 25°C) based on a recent study determining the optimal temperature for malaria transmission as 25°C<sup>76</sup>,  
425 and a mean temperature was determined for each group.

426

### 427 **Mosquitoes**

428 *Anopheles gambiae* (G3, NIH) and *A. stephensi* (Liston, Walter Reed Army Institute of Research)  
429 mosquitoes were used throughout the experiments. Mosquitoes were reared under standard insectary  
430 conditions at 27°C±0.5°C, 80%±5% relative humidity, and a 12h:12h light-dark photo-period. Larval  
431 density and amount of larval food (ground TetraFin™; Tetra, Blacksburg, VA) were standardised to

432 ensure uniform adult size. Adults were maintained on 10% glucose solution supplemented with 0.05%  
433 para-aminobenzoic acid (PABA). For the infectious feeds, 5-6-day-old female mosquitoes were randomly  
434 aspirated into cardboard cup containers that are covered with netting, and starved for approximately 6  
435 hours before infectious feed. Individual containers contained 120-150 mosquitoes.

436

#### 437 **General procedures for mosquito transmission studies**

438 *In vitro* cultured *Plasmodium falciparum* (NF54 isolate, MR4) was provided by the Parasitology Core  
439 Lab (<http://www.parasitecore.org/>) at John's Hopkins University. Gametocyte culture in stage four to five  
440 (day 14 after gametocyte initiation) was transported overnight to Penn State in a sterile 50ml falcon tube  
441 filled with fresh culture media. The culture tube was packaged in a Styrofoam box with heating pads to  
442 keep the temperature at approximately 37°C during transport. Gametocyte-infected erythrocytes were  
443 provided with fresh culture media on the day of arrival, and were maintained > 24 hours before the  
444 infectious feed to allow additional maturation of gametocytes.

445 Mosquitoes were fed on day 16 post gametocyte initiation. The proportion of erythrocytes infected  
446 with mature gametocytes (i.e. gametocytemia) generally ranged between 1-3% in the culture. An  
447 infectious blood meal was prepared by mixing gametocyte infected erythrocytes with fresh human serum  
448 and erythrocytes at 40% haematocrit on the day of blood feeding as previously described<sup>77</sup>.  
449 Gametocytemia in the blood meal was adjusted so that mosquitoes were infected at realistic infection  
450 intensities (e.g., see Supplementary Fig. 3, and Bradley *et al.*<sup>52</sup>).

451 All infectious feeds were conducted in a walk-in environment controlled chamber. Glass bell jars  
452 were uniformly covered with Parafilm to serve as membrane feeders and heated to 37°C with  
453 continuously circulating water as previously described<sup>77</sup>. An appropriate amount of infectious blood (1-2  
454 ml depending on the size of experiment but consistently the same amount within an experiment) was  
455 pipetted into each bell jar. Containers of mosquitoes were randomly allocated to bell jars to minimize any  
456 effect of position or feeder. Mosquitoes were fed for 20 min at 27°C after acclimating at 27°C for an hour,  
457 and > 95% mosquitoes were fully engorged in all infectious feeds. Immediately after blood feeding,

458 mosquitoes were placed into incubators (Percival Scientific Inc., Perry, Iowa) with appropriate  
459 temperature treatment conditions (90%±5% relative humidity, and 12h:12h light-dark photo-period) and  
460 provided daily with fresh 10% glucose solution supplemented with 0.05% PABA. Mosquitoes were  
461 transferred and fed under red light as appropriate to maintain light:dark cycles.

462 To determine vector competence, mosquitoes were randomly collected by aspirating into 95%  
463 ethanol, and midguts and salivary glands were dissected in 1× phosphate-buffered saline solution under a  
464 standard dissecting scope. Presence or absence of parasite infection was determined by examining  
465 midguts and salivary glands, and oocysts in midguts were counted, using a compound microscope. To  
466 ensure correct scoring, oocysts and sporozoites were inspected under 40× magnification and cross-  
467 checked by a second person. Oocyst or sporozoite prevalence was calculated as the total number of  
468 infected mosquitoes divided by the total number of dissected mosquitoes by combining dissection data  
469 from given dissection days and replicated containers of mosquitoes for each treatment.

470

#### 471 **Experimental design for mosquito transmission studies**

472 *Effects of biting time and diurnal fluctuating temperature on vector competence.* For experiments  
473 examining the effect of time-of-day of blood meal and diurnal temperature fluctuation on vector  
474 competence, *Anopheles* mosquitoes were infected at different times of day and maintained at 27°C with a  
475 Diurnal Temperature Range of zero (i.e. DTR 0°C) or with a DTR of 10°C (i.e. 27°C±5°C;  
476 Supplementary Fig. 6). The Parton-Logan model was used for the fluctuating temperature regime that  
477 follows a sinusoidal progression and an exponential decay for the day and night cycle, respectively<sup>33,78</sup>.  
478 The air temperature of incubator (Percival Scientific Inc., Perry, Iowa) was monitored closely using  
479 HOBO data loggers (Onset Computer Corporation, Bourne, MA) at 5 min intervals, and the accuracy of  
480 temperature was maintained with the error range of ± 0.5°C. Prior to infections, pupae were collected and  
481 placed into separate incubators in which the clocks were offset so that adult mosquitoes emerged into  
482 environments that were staggered in terms of time-of-day. This enabled us to do the infectious feeds  
483 simultaneously using the same parasite culture, but with the mosquitoes at different points in their diel

484 cycle (see Supplementary Fig. 1). *Anopheles* mosquitoes were provided with infectious blood meals in  
485 two containers of mosquitoes (150 each unless otherwise specified) at 18:00h (ZT12), 00:00h (ZT18), or  
486 06:00h (ZT0) and maintained at either 27°C with DTR 0°C or DTR 10°C (i.e. two replicates per  
487 treatment group). For dissections, twenty mosquitoes were sampled daily (10 per container) on 7, 8, and 9  
488 days post infection (dpi) for oocysts and 14, 15, and 16 dpi for sporozoites. Oocyst intensity, or oocyst or  
489 sporozoite prevalence were determined using dissection data from the three days (sample size of 60 per  
490 treatment). We repeated the experiment two times for *A. gambiae* and one time with *A. stephensi*, each  
491 with different batches of parasite culture and mosquitoes. A further independent experiment was  
492 conducted with *A. stephensi* in which approximately 150 *A. stephensi* mosquitoes were fed in a container  
493 at 18:00h (ZT12) or 23:00h (ZT23) and maintained at either 27°C with DTR 0°C or DTR 10°C.  
494 Approximately 10 mosquitoes were sampled daily on 8-10 dpi for dissecting midguts to determine oocyst  
495 intensity or prevalence, and on 13, 14, and 16 dpi for dissecting salivary glands to determine sporozoite  
496 prevalence.

497

498 ***Effect of temperature variation on vector competence.*** Effects of temperature treatment, mosquito  
499 species and/or gametocytemia on vector competence were examined in a series of infection experiments.  
500 For general procedures, approximately 120 mosquitoes were fed in a container (unless otherwise  
501 specified) with *P. falciparum* infected blood meals, and maintained at appropriate temperature conditions  
502 for each experiment. Approximately 10-15 mosquitoes were collected daily for generally 2-3 days to  
503 dissect midguts or salivary glands, unless otherwise specified. Dissection days were determined by  
504 Detinova's parasite growth model<sup>79</sup> and data from pilot tests (data not shown) to ensure we sampled when  
505 infection prevalence was at a maximum depending on temperature treatments. For measures of vector  
506 competence, oocyst intensity, or oocyst or sporozoite prevalence were determined by combining data  
507 among dissection days. A separate batch of parasite culture was used for each experiment, and  
508 mosquitoes were fed around 18:00h (ZT12) to standardise time-of-day of blood feeding, unless otherwise  
509 specified.

510 In the first experiment, infected *A. gambiae* and *A. stephensi* mosquitoes were maintained at  
511 27°C, 30°C, or 32°C to examine the effect of high temperature on vector competence. In the second  
512 experiment, to examine the effect of high temperature on early parasite infection, *A. stephensi* mosquitoes  
513 were incubated at 27°C for 3h, 6h, 12h, 24h, or 48h before moving them to 30°C. As a control group,  
514 infected mosquitoes were maintained at 27°C. In the third experiment, to examine the effects of  
515 gametocytemia and temperature interaction on vector competence, *A. stephensi* mosquitoes were fed  
516 blood meals with varying gametocytemia dilutions (1, 1/2, 1/4, or 1/10) and maintained at 27°C or 30°C.  
517 An infectious blood meal was prepared as described above, and serially diluted to generate blood meals  
518 with lower gametocytemia while maintaining 40% haematocrit. In the fourth experiment, 240 *A. gambiae*  
519 mosquitoes were fed in two containers (120 each) and kept at 21°C to examine the effect of transferring  
520 mosquitoes between different temperatures. Prior to the infection, pupae were collected and placed into  
521 the incubator at 21°C. As a control, mosquitoes were kept at 27°C throughout. Control and treatment  
522 mosquitoes were fed at 27°C (at 00:00h [ZT18]).

523

524 **Feeding compliance and blood meal size.** To determine the effect of different temperatures on blood  
525 feeding compliance, we compared feeding rates of *A. gambiae* maintained at 21°C DTR 0°C with the  
526 27°C DTR 0°C control (data from Fig. 1, 2<sup>nd</sup> feed). Mosquitoes were reared as described above.  
527 Mosquitoes were provided with infectious blood meals in two containers (120 each) at 18:00h (ZT12),  
528 00:00h (ZT18), or 06:00h (ZT0). Blood feeding compliance was measured by scoring the proportion of  
529 unfed mosquitoes.

530 To explore whether transfer of mosquitoes from different points on the fluctuating cycle (i.e.  
531 18:00h [ZT12], 00:00h [ZT18], 06:00h [ZT0] in the 27°C DTR 10°C temperature regime) affected  
532 subsequent blood meal size of mosquitoes feeding at 27°C, we compared the body weight of blood-fed  
533 mosquitoes as a proxy for blood meal size. Mosquitoes were reared following the same protocol for the  
534 time-of-day and fluctuating temperature experiment described above. The blood meal was prepared using  
535 the same method used for the infectious feeds, except we used uninfected blood on this occasion. After

536 starving for 6h prior to blood feeding by removing the sugar source, 5~6 day old *A. gambiae* and *A.*  
537 *stephensi* female mosquitoes were blood fed for 20 min at 27°C in two containers (30 each) per each  
538 time-of-day treatment with 1h acclimation at 27°C. One hour post blood feeding, blood-fed mosquitoes  
539 were killed by freezing at -20°C for 30 min, and unfed mosquitoes were discarded. Twenty mosquito  
540 samples were randomly selected from each container to measure the whole body weight of individual  
541 mosquitoes (i.e. 40 sample size per treatment group per species), using an analytical balance with the  
542 accuracy of  $\pm 0.1$ mg (MS104S; Mettler Toledo, Columbus, OH).

543

#### 544 **Thermal avoidance assay**

545 *A. gambiae* mosquitoes were collected at pupal stage and adapted for > 5 days at 27°C DTR 10°C until  
546 blood feeding. Mosquitoes were fed with either *P. falciparum* infected or uninfected blood meals at  
547 06:00h (ZT0) as described above, and maintained at 27°C until used for the behavioural assay. Three  
548 containers of mosquitoes were fed (100 mosquitoes per container) for the infected or uninfected groups,  
549 and mosquitoes from a container from each group were used for each round of assay. Infected and  
550 uninfected blood meals were prepared as described above, but gametocyte infected-erythrocytes were  
551 replaced with uninfected erythrocytes in the uninfected blood meal. The behavioural assay was conducted  
552 in an environmental chamber at  $27^{\circ}\text{C} \pm 0.5^{\circ}\text{C}$  with  $80\% \pm 5\%$  relative humidity using WHO insecticide  
553 bioassay tubes as described previously<sup>41</sup> (Supplementary Fig. 7). One side of the tube (the holding tube)  
554 was wrapped with plastic tubing with continuously circulating water heated by a water bath (WB05;  
555 PolyScience Inc., Niles, IL) to control the inner surface temperature of holding tube, while the  
556 temperature of escape tube was maintained at  $28^{\circ}\text{C} \pm 0.5^{\circ}\text{C}$ . Ten mosquitoes fully engorged with either  
557 infected or uninfected blood meals were introduced into a holding tube and acclimated at  $28^{\circ}\text{C} \pm 0.5^{\circ}\text{C}$ .  
558 The assay tubes were used in rotation by mosquito groups fed with either infected or uninfected blood  
559 meals within and between the assays. The gate between the holding and escape tubes was opened after 20  
560 min of acclimation, and mosquitoes could then choose to move to the escape tube. The number of  
561 mosquitoes in the escape tube was recorded every 2 min. No mosquitoes in the escape tube returned ever

562 to the holding tube during the entire assay period. The temperature of water bath was set to 32.6°C at the  
563 time of gate was opened, which was equivalent to the maximum temperature in 27°C DTR 10°C  
564 treatment. The surface temperature of holding tube increased at the rate of approximately 0.23°C/min  
565 over 20 min and was maintained at 32.6°C±0.5°C for an additional 20 min. The temperature of the water  
566 bath was then set to 36°C to further examine the thermal behaviour. The surface temperature of holding  
567 tube increased at the rate of approximately 0.17°C/min over 20 min, and was maintained at 36°C±0.5°C  
568 for additional 20 min. The rates of temperature increase were comparable to that of Kirby and Lindsay<sup>41</sup>.  
569 The temperature of the two holding tubes in the treatment group was recorded at 5 sec intervals using  
570 thermocouple data loggers (SL500; MicroDAQ.com, Ltd., Contocook, NH) throughout the experiments.  
571 Baseline activity of mosquitoes were monitored as a control by keeping the temperature of the holding  
572 and escape tubes at 28°C±5°C throughout the experiment and otherwise following the same methods as  
573 for the treatment group. A total of eight assay tubes were used for running the control and treatment  
574 groups (four each) at the same time, with two replicates for the mosquito group fed with infected or  
575 uninfected blood meals. Three rounds of assay were conducted between 4-10 hours post infection  
576 totalling six replicates for each mosquito group (see Supplementary Fig. 7 for experimental setup).  
577 Oocyst prevalence and intensity were determined on 8 dpi in total cohort of 60 mosquitoes (20 per  
578 container) fed with the same infectious blood meal and kept at 27°C.

579

## 580 **Transmission dynamics model**

581 A deterministic version of a transmission dynamics model of malaria<sup>35-38</sup> was adjusted and used to  
582 explore the potential public health implications of a theoretical change in mosquito infectivity driven by  
583 the timing of mosquito bites. The transmission model mechanistically tracks *P. falciparum* infection in  
584 people and mosquitoes. Susceptible people are exposed to infectious mosquito bites at a rate dependent on  
585 local mosquito density and infectivity. Mosquito dynamics describe the effects of mosquito control and  
586 the resulting decline in egg laying<sup>36</sup>. Adult mosquitoes can be either susceptible to malaria, infected, or  
587 infectious to people.

588

589 **Model adjustment.** Susceptible ( $S_V$ ), exposed ( $E_V$ ) and infective ( $I_V$ ) mosquitoes are present, and the  
590 dynamics of these are expressed as:

591

592 
$$\frac{d}{dt}(S_V) = -inc_e - \mu_V S_V + \beta$$

593 
$$\frac{d}{dt}(E_V) = inc_e - \mu_V E_V - inc_v$$

594 
$$\frac{d}{dt}(I_V) = inc_v - \mu_V I_V$$

595

596 Where mosquito pupae emerge as adults at a rate  $\beta$  that is density dependent and die at a constant rate  $\mu_V$   
597 which is assumed to be independent of infection status. The rate of exposure to infection with  
598 *Plasmodium falciparum* ( $inc_e$ ) is dependent on the force of infections ( $FOI_V$ ) such that:

599

600 
$$inc_e = FOI_V \times S_V$$

601

602 The Force of Infection is the product of: i) the sum of infectivity from all infective people in the  
603 population, ii) the biting rate, which is allowed to vary such that some people could be bitten more than  
604 others; iii) the biting rates of mosquitoes, which is dependent on vector intervention categories (bed nets  
605 and/or indoor residual spraying may be used), and; iv) the age-specific force of infection, which is  
606 normalized so that people of different ages could contribute differently to transmission.

607 The rate that mosquitoes then became infectious ( $inc_v$ ) is dependent on the proportion of  
608 mosquitoes that survived long enough to transmit infection onward. The extrinsic incubation period (EIP)  
609 is the number of days needed for sporozoites to be found in the salivary glands. The current model has a  
610 constant EIP of 11.5 days (to match experimental data).

611



612 
$$inc_V = inc_e \times Surv$$

613 
$$Surv = exp(-\mu_V \times EIP)$$

614

615 Based on the experimental observations, the transmission model was adjusted so that mosquitoes  
616 that exhibit either evening ( $Mosq_{EV}$ ), midnight ( $Mosq_{MD}$ ) or morning ( $Mosq_{MN}$ ) biting behaviour had  
617 different rates of becoming infective ( $inc_V$ ).

618 The differential equations describing the infection status of adult mosquitoes is adjusted such  
619 that:

620

621 
$$\frac{d}{dt}(S_V) = -inc_e - \mu_V S_V + \beta$$

622 
$$\frac{d}{dt}(E_V) = inc_e - \mu_V E_V - (Mosq_{EV} + Mosq_{MD} + Mosq_{MN}) \times inc_v$$

623 
$$\frac{d}{dt}(I_V) = (Mosq_{EV} + Mosq_{MD} + Mosq_{MN}) \times inc_v - \mu_V I_V$$

624

625 The sum proportions of mosquitoes in the different feeding classes equals 1 but the conversion to  
626 sporozoite positive status is different for each group. Our empirical study showed that about 55% of  
627 mosquitoes that bite in the evening became infectious (i.e. sporozoite positive), compared to 22.5% that  
628 bite at midnight and 0.83% of those that bite in the morning. The conversion term,  $tob$ :

629

630 
$$tob = (Mosq_{EV} + Mosq_{MD} + Mosq_{MN})$$

631

632 was parameterized to sum to 1 when all mosquitoes are feeding at midnight. The proportion of  
633 mosquitoes was adjusted given the ratio of 55.0%:22.5%:0.83% for vector competence in evening,  
634 midnight and morning biters respectively, such that:

635

636 
$$Mosq_{EV} = Prop_{EV} \times 2.444$$

637 
$$Mosq_{MD} = Prop_{MD} \times 1$$

638 
$$Mosq_{MN} = Prop_{MN} \times 0.037$$

639

640 For baseline (control) scenarios representing constant vector competence with respect to biting time, the  
641 proportion of mosquitoes was adjusted given the ratio of 22.5%:22.5%:22.5% for vector competence of  
642 evening, midnight and morning biters, respectively (assuming all equals to midnight biting), such that:

643

644 
$$Mosq_{EV} = Prop_{EV} \times 1$$

645 
$$Mosq_{MD} = Prop_{MD} \times 1$$

646 
$$Mosq_{MN} = Prop_{MN} \times 1$$

647

648 To estimate 95% confidence intervals (CIs) for prevalence data, exact Clopper-Pearson 95% CI  
649 was estimated from the empirical vector competence data of 55% (45.7-64.1%), 22.5% (15.4-31.0%), and  
650 0.83% (0.02-4.7%) for evening, midnight and morning biting, respectively. These CI values were then  
651 divided by the standard prevalence of 22.5% to calculate equivalent parameter ratios of 2.444 (2.029-  
652 2.848), 1 (0.684-1.379) and 0.037 (0.001-0.203) for evening, midnight and morning biting, respectively.

653

654 ***Mosquito biting patterns.*** Evidence suggests that most mosquitoes actively search for blood-meals in the  
655 middle of the night and less so either in the evening or morning<sup>71,74,80,81</sup>. To reflect this, we considered a  
656 ‘status quo’ scenario that examines the proportion of mosquitoes feeding during the evening and morning  
657 to be 0.15 each whilst the proportion feeding at midnight is 0.7 (as per Supplementary Table 6; runs 1, 4,  
658 7, and 10). We then explored what would happen if mosquito feeding patterns shifted toward evening  
659 (Supplementary Table 6; runs 2, 5, 8, and 11) or morning (Supplementary Table 6, runs 3, 6, 9, and 12).

660

661 **Contact with bed nets.** The degree of protection that a bed net can elicit depends on the proportion of  
662 bites received while a person is protected. Therefore, in the transmission model, the impact of bed nets is  
663 determined by the proportion of bites that happen when a person is in bed ( $\Phi_B$ ). Bed nets are modelled to  
664 impact the probability of mosquito from species  $i$  successfully biting ( $w_i$ ), and the probability of  
665 repellence (a mosquito is reflected away by the intervention before biting) ( $z_i$ ) following (1):

$$w_i = 1 - \varphi_B + \varphi_B s_N$$

$$z_i = \varphi_B r_N$$

666  
667  
668  
669  
670 Mosquitoes that successfully feed ( $s_N$ ), die ( $d_N$ ) or repeat a feeding attempt ( $r_N$ ) in the presence of a bed  
671 net relative to the absence of a bed net were estimated using data from experimental hut trials that  
672 examined the entomological impact of LLINs<sup>2,35</sup>. People are usually not in bed at 18:00h and start getting  
673 up before 06:00h<sup>82,83</sup>, thus the probability of LLIN contact varied by mosquito biting time (in reality,  
674 these proportions may vary night to night or person to person but in the absence of data, we simply  
675 assigned different estimates for  $\Phi_B$  to each biting class):

$$\varphi_B = (\varphi_{B_{EV}} \times Prop_{EV} + \varphi_{B_{MD}} \times Prop_{MD} + \varphi_{B_{MN}} \times Prop_{MN})$$

676  
677  
678  
679 For the outputs in Supplementary Table 6,  $\varphi_{B_{EV}}$  and  $\varphi_{B_{MN}}$  were defined as 0.425 (half the contact with  
680 bed nets of midnight feeding mosquitoes) whilst  $\varphi_{B_{MD}}$  was parameterized to be 0.85<sup>16</sup>. This reflected  
681 mosquito population that feeds principally in the evening (runs 2, 5, 8, and 11), at midnight (runs 1, 4, 7,  
682 and 10) or in the morning (runs 3, 6, 9, and 12).

683  
684 **Model simulations.** We explored how much biting time might affect estimates of prevalence in 2-10-  
685 year-old children in a theoretical high transmission setting i) in the absence of LLINs (runs 1-3 for altered

686 vector competence and runs 7-9 for constant vector competence) and ii) in the presence of LLINs but with  
687 equal probability of exposure to LLINs for each of the biting classes (runs 1-3 for altered vector  
688 competence and runs 7-9 for constant vector competence); and iii) what would happen if the probability  
689 of exposure to LLINs differed between biting classes, consistent with hosts less likely to be in bed and  
690 protected by bed nets in the evening and morning (runs 4-6 for altered vector competence and runs 10-12  
691 for constant vector competence). For simplicity, we assumed that: i) the mosquito population is density  
692 dependent; ii) biting rates are constant between people; iii) that there are either no interventions, or 50%  
693 of people use bed nets, and; iv) there is no pyrethroid resistance in the mosquito population. The scenario  
694 was a high transmission, perennial setting such that without interventions prevalence in 2-10-year-old  
695 children is about 60%.

696 We estimated the relative efficacy of LLINs as:

697

$$698 \quad Efficacy = \frac{(Prevalence_0 - Prevalence_N)}{Prevalence_0} \times 100$$

699

700 Where subscripts 0 and N represent the scenarios without or with bed nets, respectively. Post bed net  
701 prevalence estimates are taken 3 years after LLINs were introduced to estimate the efficacy.

702

### 703 **Statistical analyses**

704 *Literature review.* The ratio of the number of cases where biting time oriented towards either evening or  
705 morning (Supplementary Table 1 and Supplementary Table 2) was compared to the expected ratio of 50%  
706 using chi-square goodness-of-fit test. Fisher's exact test (two-tailed) was used to test if this ratio of  
707 evening and morning biting was different between the high and low temperature groups (Supplementary  
708 Table 1 and Supplementary Table 2).

709

710 ***Mosquito transmission experiments.*** For analysing infection data in general, Generalized Linear Models  
711 (GLM) were used unless otherwise specified. Oocyst intensity data were analysed with a negative  
712 binomial error structure with log link considering the highly over-dispersed nature of parasite load data,  
713 unless otherwise specified (see Supplementary Table 12). Oocyst or sporozoite prevalence data were  
714 analysed with a binomial error structure with logit link. Model fit and distributions were determined based  
715 on Akaike's Information Criterion (AIC) value and residual plots.

716 For the time-of-day and fluctuating temperature experiment using *A. gambiae*, a Generalized Linear  
717 Mixed effects Model (GLMM) was used to examine the effects of time-of-day of blood meal, temperature  
718 regime, and their interaction (fixed variables) on oocyst intensity, or oocyst or sporozoite prevalence  
719 (dependent variables). Infectious feed was included as a random variable, and dissection day was  
720 additionally included as a fixed variable in the model to account for any day effect. Time-of-day groups  
721 were pairwise compared for oocyst intensity, or oocyst or sporozoite prevalence within temperature  
722 regime groups and between temperature regime groups for each time-of-day group, using post-hoc  
723 contrasts followed by Bonferroni corrections.

724 For the time-of-day and fluctuating temperature experiment using *A. stephensi* replicated in two  
725 containers of mosquitoes, GLMM was used to examine the effects of time-of-day of blood meal,  
726 temperature regime, and their interaction (fixed variables) on oocyst intensity and prevalence (dependent  
727 variables). In addition, in the model analyses, mosquito container and dissection day was included as a  
728 random and fixed variable, respectively. For sporozoite prevalence data, GLM was used for pooled data  
729 from two containers of mosquitoes after confirming no difference in sporozoite prevalence between two  
730 replicate containers using Fisher's exact test (two-sided) within each treatment group. This was because  
731 the variance of the random effect was estimated as zero (i.e. Hessian matrix not positive definite)  
732 rendering validity of model uncertain when GLMM was used for prevalence data<sup>84,85</sup>. Because of slight  
733 differences in experimental design, the second time-of-day and fluctuating temperature experiment using  
734 *A. stephensi* which used just one container of mosquitoes was analysed separately. Similarly to the model  
735 structure used above, GLM was used to examine the effects of time-of-day, temperature regime, and their

736 interaction in addition to dissection day (fixed variables) on oocyst intensity, or oocyst or sporozoite  
737 prevalence (dependent variables). For both infection experiments with *A. stephensi*, time-of-day groups  
738 were pairwise compared for oocyst intensity, or oocyst or sporozoite prevalence within temperature  
739 regime groups and between temperature regime groups for each time-of-day group, using post-hoc  
740 contrasts followed by Bonferroni corrections.

741 For the constant or translocation experiments, GLM was used to examine the effects of temperature  
742 treatments, mosquito species, gametocytemia and/or interactions on oocyst intensity, or oocyst or  
743 sporozoite prevalence in each study. Treatment groups with zero infections were not included in the  
744 analyses<sup>84,85</sup>. When one control group was compared to all other treatment groups, post-hoc contrasts  
745 were used followed by Bonferroni corrections. To examine the effect of parasite intensity on the reduction  
746 in infection prevalence at 30°C, a linear regression was used to examine the relationship between the  
747 mean oocyst intensity in 27°C control group and per cent reduction in the oocyst prevalence at 30°C. The  
748 per cent reduction was calculated as the reduced percentage in oocyst prevalence in the 30°C treatment  
749 relative to oocyst prevalence in the 27°C control using the data collected from the infection studies  
750 described above.

751

752 ***Mosquito translocation and blood feeding compliance.*** The effects of temperature during blood feeding  
753 and time-of-day on the feeding compliance of *A. gambiae* mosquitoes (blood feeding success of  
754 individual mosquitoes) were examined by using a GLMM (binomial error structure, logit link) as each  
755 treatment group had two technically replicated containers of mosquitoes. Temperature, time-of-day, and  
756 their interaction were included as fixed variables, in addition to container of mosquitoes as a random  
757 variable in the model.

758

759 ***Mosquito translocation and blood meal size.*** To examine the effect of transferring *A. gambiae* and *A.*  
760 *stephensi* mosquitoes to 27°C for blood feeding from prevailing temperatures at different times of day in  
761 27°C DTR 10°C, GLMM was used for time-of-day, mosquito species, and their interaction as fixed

762 variable, and container of mosquitoes as random variable with normal distribution with an identity link  
763 after confirming normality assumptions (e.g. normal distribution of residuals, equal variance, etc.).

764

765 ***Thermal avoidance assay.*** The escape probability of mosquitoes combined from six replicates was  
766 analysed using Kaplan Meier Log-rank test to examine the effects of parasite infection on the proportion  
767 of mosquitoes that escaped over time. Any mosquitoes that escaped within one minute after opening the  
768 gate were left-censored as it was considered a response to human disturbance. Mosquitoes that remained  
769 in the holding tube until the end of assay were right-censored.

770 SPSS Statistics 25 (SPSS Incorporation, Chicago, IL) was used for all analyses. Information on  
771 experimental designs, dissection methods, and/or statistical analyses on empirical studies are summarized  
772 in Supplementary Table 12.

773

#### 774 **Ethical statement**

775 We have complied with all relevant ethical regulations, and all experiments were conducted under Penn  
776 State IBC protocol #48219.

777

#### 778 **Reporting summary**

779 Further information on research design is available in the Nature Research Reporting Summary linked to  
780 this article.

781

#### 782 **Data availability**

783 The authors declare that all data supporting the findings of this study are available within the paper and its  
784 supplementary information files.

785

#### 786 **Code availability**

787 All code used in modelling analysis is available upon request



788 **References**

- 789 1 Bhatt, S. *et al.* The effect of malaria control on *Plasmodium falciparum* in Africa between 2000  
790 and 2015. *Nature* **526**, 207-211, doi:10.1038/nature15535 (2015).
- 791 2 Churcher, T. S., Lissenden, N., Griffin, J. T., Worrall, E. & Ranson, H. The impact of pyrethroid  
792 resistance on the efficacy and effectiveness of bednets for malaria control in Africa. *eLife* **5**,  
793 doi:10.7554/eLife.16090 (2016).
- 794 3 Ranson, H. & Lissenden, N. Insecticide resistance in African *Anopheles* mosquitoes: a worsening  
795 situation that needs urgent action to maintain malaria control. *Trends Parasitol.* **32**, 187-196,  
796 doi:10.1016/j.pt.2015.11.010 (2016).
- 797 4 Hemingway, J. *et al.* Averting a malaria disaster: will insecticide resistance derail malaria  
798 control? *Lancet* **387**, 1785-1788, doi:10.1016/s0140-6736(15)00417-1 (2016).
- 799 5 Moiroux, N. *et al.* Changes in *Anopheles funestus* biting behavior following universal coverage of  
800 long-lasting insecticidal nets in Benin. *J. Infect. Dis.* **206**, 1622-1629, doi:10.1093/infdis/jis565  
801 (2012).
- 802 6 Russell, T. L. *et al.* Increased proportions of outdoor feeding among residual malaria vector  
803 populations following increased use of insecticide-treated nets in rural Tanzania. *Malar. J.* **10**,  
804 doi:10.1186/1475-2875-10-80 (2011).
- 805 7 Thomsen, E. K. *et al.* Mosquito behavior change after distribution of bednets results in decreased  
806 protection against malaria exposure. *J. Infect. Dis.* **215**, 790-797, doi:10.1093/infdis/jiw615  
807 (2017).
- 808 8 Carrasco, D. *et al.* Behavioural adaptations of mosquito vectors to insecticide control. *Current*  
809 *Opinion in Insect Science*, doi:<https://doi.org/10.1016/j.cois.2019.03.005> (2019).
- 810 9 Protopopoff, N. *et al.* Effectiveness of a long-lasting piperonyl butoxide-treated insecticidal net  
811 and indoor residual spray interventions, separately and together, against malaria transmitted by  
812 pyrethroid-resistant mosquitoes: a cluster, randomised controlled, two-by-two factorial design  
813 trial. *Lancet* **391**, 1577-1588, doi:10.1016/s0140-6736(18)30427-6 (2018).

- 814 10 Uragayala, S. *et al.* Village-scale (Phase III) evaluation of the efficacy and residual activity of  
815 SumiShield((R)) 50 WG (Clothianidin 50%, w/w) for indoor spraying for the control of  
816 pyrethroid-resistant *Anopheles culicifacies* Giles in Karnataka state, India. *Trop. Med. Int. Health*  
817 **23**, 605-615, doi:10.1111/tmi.13056 (2018).
- 818 11 Mashauri, F. M. *et al.* Indoor residual spraying with micro-encapsulated pirimiphos-methyl  
819 (Actellic (R) 300CS) against malaria vectors in the Lake Victoria basin, Tanzania. *PLoS One* **12**,  
820 doi:10.1371/journal.pone.0176982 (2017).
- 821 12 Bayili, K. *et al.* Evaluation of efficacy of Interceptor (R) G2, a long-lasting insecticide net coated  
822 with a mixture of chlorfenapyr and alpha-cypermethrin, against pyrethroid resistant *Anopheles*  
823 *gambiae* s.l. in Burkina Faso. *Malar. J.* **16**, doi:10.1186/s12936-017-1846-4 (2017).
- 824 13 Tiono, A. B. *et al.* Efficacy of Olyset Duo, a bednet containing pyriproxyfen and permethrin,  
825 versus a permethrin-only net against clinical malaria in an area with highly pyrethroid-resistant  
826 vectors in rural Burkina Faso: a cluster-randomised controlled trial. *Lancet* **392**, 569-580,  
827 doi:10.1016/s0140-6736(18)31711-2 (2018).
- 828 14 Gatton, M. L. *et al.* The importance of mosquito behavioural adaptations to malaria control in  
829 Africa. *Evolution* **67**, 1218-1230, doi:10.1111/evo.12063 (2013).
- 830 15 Killeen, G. F. Characterizing, controlling and eliminating residual malaria transmission. *Malar. J.*  
831 **13**, doi:10.1186/1475-2875-13-330 (2014).
- 832 16 Sherrard-Smith, E. *et al.* Mosquito feeding behavior and how it influences residual malaria  
833 transmission across Africa. *Proc. Natl. Acad. Sci. U. S. A.* **116**, 15086-15095,  
834 doi:10.1073/pnas.1820646116 (2019).
- 835 17 Durnez, L. & Coosemans, M. *Residual transmission of malaria: an old issue for new approaches.*  
836 (Intech Europe, 2013).
- 837 18 Lambrechts, L. Quantitative genetics of *Aedes aegypti* vector competence for dengue viruses:  
838 towards a new paradigm? *Trends Parasitol.* **27**, 111-114, doi:10.1016/j.pt.2010.12.001 (2011).

- 839 19 Baton, L. A. & Ranford-Cartwright, L. C. Spreading the seeds of million-murdering death:  
840 metamorphoses of malaria in the mosquito. *Trends Parasitol.* **21**, 573-580,  
841 doi:10.1016/j.pt.2005.09.012 (2005).
- 842 20 Beier, J. C. Malaria parasite development in mosquitoes. *Annu. Rev. Entomol.* **43**, 519-543,  
843 doi:10.1146/annurev.ento.43.1.519 (1998).
- 844 21 Lefevre, T., Vantaux, A., Dabire, K. R., Mouline, K. & Cohuet, A. Non-genetic determinants of  
845 mosquito competence for malaria parasites. *PLoS Pathog.* **9**, doi:10.1371/journal.ppat.1003365  
846 (2013).
- 847 22 Westwood, M. L. *et al.* The evolutionary ecology of circadian rhythms in infection. *Nature*  
848 *Ecology & Evolution* **3**, 552-560, doi:10.1038/s41559-019-0831-4 (2019).
- 849 23 Rund, S. S. C., O'Donnell, A. J., Gentile, J. E. & Reece, S. E. Daily rhythms in mosquitoes and  
850 their consequences for malaria transmission. *Insects* **7**, doi:10.3390/insects7020014 (2016).
- 851 24 Rund, S. S. C., Hou, T. Y., Ward, S. M., Collins, F. H. & Duffield, G. E. Genome-wide profiling  
852 of diel and circadian gene expression in the malaria vector *Anopheles gambiae*. *Proc. Natl. Acad.*  
853 *Sci. U. S. A.* **108**, E421-E430, doi:10.1073/pnas.1100584108 (2011).
- 854 25 Blanford, J. I. *et al.* Implications of temperature variation for malaria parasite development across  
855 Africa. *Sci Rep* **3**, doi:10.1038/srep01300 (2013).
- 856 26 Glunt, K. D., Blanford, J. I. & Paaijmans, K. P. Chemicals, climate, and control: increasing the  
857 effectiveness of malaria vector control tools by considering relevant temperatures. *PLoS Pathog.*  
858 **9**, doi:10.1371/journal.ppat.1003602 (2013).
- 859 27 Paaijmans, K. P. *et al.* Downscaling reveals diverse effects of anthropogenic climate warming on  
860 the potential for local environments to support malaria transmission. *Clim. Change* **125**, 479-488,  
861 doi:10.1007/s10584-014-1172-6 (2014).
- 862 28 Thomas, S. *et al.* Microclimate variables of the ambient environment deliver the actual estimates  
863 of the extrinsic incubation period of *Plasmodium vivax* and *Plasmodium falciparum*: a study from

- 864 a malaria-endemic urban setting, Chennai in India. *Malar. J.* **17**, doi:10.1186/s12936-018-2342-1  
865 (2018).
- 866 29 Eling, W., Hooghof, J., van de Vegte-Bolmer, M., Sauerwein, R. & van Gemert, G.-J. Tropical  
867 temperatures can inhibit development of the human malaria parasite *Plasmodium falciparum* in  
868 the mosquito *Proceedings Experimental and Applied Entomology (Amsterdam)* **12** (2001).
- 869 30 Noden, B. H., Kent, M. D. & Beier, J. C. The impact of variations in temperature on early  
870 *Plasmodium falciparum* development in *Anopheles stephensi*. *Parasitology* **111**, 539-545,  
871 doi:10.1017/s0031182000077003 (1995).
- 872 31 Murdock, C. C., Moller-Jacobs, L. L. & Thomas, M. B. Complex environmental drivers of  
873 immunity and resistance in malaria mosquitoes. *Proceedings of the Royal Society B-Biological*  
874 *Sciences* **280**, doi:10.1098/rspb.2013.2030 (2013).
- 875 32 Gillies, M. T. & De Meillon, B. *The Anophelinae of Africa south of the Sahara (Ethiopian*  
876 *zoogeographical region)*. 2nd edn, (South African Institute for Medical Research, 1968).
- 877 33 Paaijmans, K. P. *et al.* Influence of climate on malaria transmission depends on daily temperature  
878 variation. *Proc. Natl. Acad. Sci. U. S. A.* **107**, 15135-15139, doi:10.1073/pnas.1006422107  
879 (2010).
- 880 34 Paaijmans, K. P., Read, A. F. & Thomas, M. B. Understanding the link between malaria risk and  
881 climate. *Proc. Natl. Acad. Sci. U. S. A.* **106**, 13844-13849, doi:10.1073/pnas.0903423106 (2009).
- 882 35 Griffin, J. T. *et al.* Reducing *Plasmodium falciparum* malaria transmission in Africa: a model-  
883 based evaluation of intervention strategies. *PLoS Med.* **7**, doi:10.1371/journal.pmed.1000324  
884 (2010).
- 885 36 White, M. T. *et al.* Modelling the impact of vector control interventions on *Anopheles gambiae*  
886 population dynamics. *Parasites Vectors* **4**, doi:10.1186/1756-3305-4-153 (2011).
- 887 37 Griffin, J. T., Ferguson, N. M. & Ghani, A. C. Estimates of the changing age-burden of  
888 *Plasmodium falciparum* malaria disease in sub-Saharan Africa. *Nat. Commun.* **5**,  
889 doi:10.1038/ncomms4136 (2014).

- 890 38 Griffin, J. T. *et al.* Gradual acquisition of immunity to severe malaria with increasing exposure.  
891 *Proceedings of the Royal Society B-Biological Sciences* **282**, doi:10.1098/rspb.2014.2657 (2015).
- 892 39 Killeen, G. F. *et al.* Made-to-measure malaria vector control strategies: rational design based on  
893 insecticide properties and coverage of blood resources for mosquitoes. *Malar. J.* **13**,  
894 doi:10.1186/1475-2875-13-146 (2014).
- 895 40 Janko, M. M., Churcher, T. S., Emch, M. E. & Meshnick, S. R. Strengthening long-lasting  
896 insecticidal nets effectiveness monitoring using retrospective analysis of cross-sectional,  
897 population-based surveys across sub-Saharan Africa. *Sci Rep* **8**, doi:10.1038/s41598-018-35353-z  
898 (2018).
- 899 41 Kirby, M. J. & Lindsay, S. W. Responses of adult mosquitoes of two sibling species, *Anopheles*  
900 *arabiensis* and *A. gambiae* s.s. (Diptera : Culicidae), to high temperatures. *Bull. Entomol. Res.* **94**,  
901 441-448, doi:10.1079/ber2004316 (2004).
- 902 42 Benoit, J. B. *et al.* Drinking a hot blood meal elicits a protective heat shock response in  
903 mosquitoes. *Proc. Natl. Acad. Sci. U. S. A.* **108**, 8026-8029, doi:10.1073/pnas.1105195108  
904 (2011).
- 905 43 Lahondere, C. & Lazzari, C. R. Mosquitoes cool down during blood feeding to avoid overheating.  
906 *Curr. Biol.* **22**, 40-45, doi:10.1016/j.cub.2011.11.029 (2012).
- 907 44 Ferguson, H. M. *et al.* Selection of mosquito life-histories: a hidden weapon against malaria?  
908 *Malar. J.* **11**, doi:10.1186/1475-2875-11-106 (2012).
- 909 45 Murdock, C. C., Paaijmans, K. P., Cox-Foster, D., Read, A. F. & Thomas, M. B. Rethinking  
910 vector immunology: the role of environmental temperature in shaping resistance. *Nat. Rev.*  
911 *Microbiol.* **10**, 869-876, doi:10.1038/nrmicro2900 (2012).
- 912 46 Murdock, C. C., Blanford, S., Hughes, G. L., Rasgon, J. L. & Thomas, M. B. Temperature alters  
913 *Plasmodium* blocking by *Wolbachia*. *Sci Rep* **4**, doi:10.1038/srep03932 (2014).

- 914 47 Lyons, C. L., Coetzee, M., Terblanche, J. S. & Chown, S. L. Thermal limits of wild and  
915 laboratory strains of two African malaria vector species, *Anopheles arabiensis* and *Anopheles*  
916 *funestus*. *Malar. J.* **11**, doi:10.1186/1475-2875-11-226 (2012).
- 917 48 Sternberg, E. D. & Thomas, M. B. Local adaptation to temperature and the implications for  
918 vector-borne diseases. *Trends Parasitol.* **30**, 115-122, doi:10.1016/j.pt.2013.12.010 (2014).
- 919 49 Siddons, L. B. Observations on the influence of atmospheric temperature and humidity on the  
920 Infectivity of *Anopheles culicifacies* Giles. *Journal of the Malaria Institute of India* **5**, 375-388  
921 (1944).
- 922 50 Knowles, R. & Basu, B. C. Laboratory studies on the infectivity of *Anopheles stephensi*. *Journal*  
923 *of the Malaria Institute of India* **5**, 1-29 (1943).
- 924 51 Okech, B. A. *et al.* Resistance of early midgut stages of natural *Plasmodium falciparum* parasites  
925 to high temperatures in experimentally infected *Anopheles gambiae* (Diptera : Culicidae). *J.*  
926 *Parasitol.* **90**, 764-768, doi:10.1645/ge-135r1 (2004).
- 927 52 Bradley, J. *et al.* Predicting the likelihood and intensity of mosquito infection from sex specific  
928 *Plasmodium falciparum* gametocyte density. *eLife* **7**, doi:10.7554/eLife.34463 (2018).
- 929 53 Pathak, A. K., Shiau, J. C., Thomas, M. B. & Murdock, C. Field relevant variation in ambient  
930 temperature modifies the density-dependent establishment of *Plasmodium falciparum* in  
931 mosquitoes: implications for the infectious reservoir and beyond? *BioRxiv*,  
932 doi:<https://doi.org/10.1101/699850> (2019).
- 933 54 Schneider, P. *et al.* Adaptive plasticity in the gametocyte conversion rate of malaria parasites.  
934 *PLoS Pathog.* **14**, doi:10.1371/journal.ppat.1007371 (2018).
- 935 55 Schneider, P. *et al.* Adaptive periodicity in the infectivity of malaria gametocytes to mosquitoes.  
936 *Proceedings of the Royal Society B-Biological Sciences* **285**, doi:10.1098/rspb.2018.1876 (2018).
- 937 56 Githeko, A. K. *et al.* Confirmation that *Plasmodium falciparum* has aperiodic infectivity to  
938 *Anopheles gambiae* *Med. Vet. Entomol.* **7**, 373-376, doi:10.1111/j.1365-2915.1993.tb00708.x  
939 (1993).

- 940 57 Magesa, S. M., Mdira, Y. K., Akida, J. A., Bygbjerg, I. C. & Jakobsen, P. H. Observations on the  
941 periodicity of *Plasmodium falciparum* gametocytes in natural human infections. *Acta Trop.* **76**,  
942 239-246, doi:10.1016/s0001-706x(00)00110-8 (2000).
- 943 58 Ferguson, H. M. *et al.* Ecology: a prerequisite for malaria elimination and eradication. *PLoS Med.*  
944 **7**, doi:10.1371/journal.pmed.1000303 (2010).
- 945 59 Thomas, M. B. *et al.* Lessons from agriculture for the sustainable management of malaria vectors.  
946 *PLoS Med.* **9**, doi:10.1371/journal.pmed.1001262 (2012).
- 947 60 Lefevre, T. *et al.* Transmission traits of malaria parasites within the mosquito: Genetic variation,  
948 phenotypic plasticity, and consequences for control. *Evol. Appl.* **11**, 456-469,  
949 doi:10.1111/eva.12571 (2018).
- 950 61 Stratman-Thomas, W. K. The influence of temperature on *Plasmodium vivax*. *The American*  
951 *Society of Tropical Medicine and Hygiene* **s1-20**, 703-715 (1940).
- 952 62 Ball, G. H. & Chao, J. Temperature stresses on the mosquito phase of *Plasmodium relictum*. *J.*  
953 *Parasitol.* **50**, 748-752 (1964).
- 954 63 Vanderberg, J. P. & Yoeli, M. Effects of temperature on sporogonic development of *Plasmodium*  
955 *berghei*. *J. Parasitol.* **52**, 559-+, doi:10.2307/3276326 (1966).
- 956 64 Simoes, M. L., Caragata, E. P. & Dimopoulos, G. Diverse host and restriction factors regulate  
957 mosquito-pathogen interactions. *Trends Parasitol.* **34**, 603-616, doi:10.1016/j.pt.2018.04.011  
958 (2018).
- 959 65 Riehle, M. M. *et al.* Natural malaria infection in *Anopheles gambiae* is regulated by a single  
960 genomic control region. *Science* **312**, 577-579, doi:10.1126/science.1124153 (2006).
- 961 66 Molina-Cruz, A. *et al.* *Plasmodium* evasion of mosquito immunity and global malaria  
962 transmission: The lock-and-key theory. *Proc. Natl. Acad. Sci. U. S. A.* **112**, 15178-15183,  
963 doi:10.1073/pnas.1520426112 (2015).
- 964 67 van Tol, S. & Dimopoulos, G. in *Progress in Mosquito Research Vol. 51 Advances in Insect*  
965 *Physiology* (ed A. S. Raikhel) 243-291 (Academic Press Ltd-Elsevier Science Ltd, 2016).

- 966 68 Wang, S. B. *et al.* Driving mosquito refractoriness to *Plasmodium falciparum* with engineered  
967 symbiotic bacteria. *Science* **357**, 1399-1402, doi:10.1126/science.aan5478 (2017).
- 968 69 Cirimotich, C. M. *et al.* Natural microbe-mediated refractoriness to *Plasmodium* infection in  
969 *Anopheles gambiae*. *Science* **332**, 855-858, doi:10.1126/science.1201618 (2011).
- 970 70 Bugoro, H. *et al.* Bionomics of the malaria vector *Anopheles farauti* in Temotu Province,  
971 Solomon Islands: issues for malaria elimination. *Malar. J.* **10**, doi:10.1186/1475-2875-10-133  
972 (2011).
- 973 71 Geissbuhler, Y. *et al.* Interdependence of domestic malaria prevention measures and mosquito-  
974 human interactions in urban Dar es Salaam, Tanzania. *Malar. J.* **6**, doi:10.1186/1475-2875-6-126  
975 (2007).
- 976 72 Russell, T. L. *et al.* Frequent blood feeding enables insecticide-treated nets to reduce transmission  
977 by mosquitoes that bite predominately outdoors. *Malar. J.* **15**, doi:10.1186/s12936-016-1195-8  
978 (2016).
- 979 73 Seyoum, A. *et al.* Human exposure to anopheline mosquitoes occurs primarily indoors, even for  
980 users of insecticide-treated nets in Luangwa Valley, South-east Zambia. *Parasites Vectors* **5**,  
981 doi:10.1186/1756-3305-5-101 (2012).
- 982 74 Bayoh, M. N. *et al.* Persistently high estimates of late night, indoor exposure to malaria vectors  
983 despite high coverage of insecticide treated nets. *Parasites Vectors* **7**, doi:10.1186/1756-3305-7-  
984 380 (2014).
- 985 75 Killeen, G. F. *et al.* Quantifying behavioural interactions between humans and mosquitoes:  
986 evaluating the protective efficacy of insecticidal nets against malaria transmission in rural  
987 Tanzania. *BMC Infect. Dis.* **6**, doi:10.1186/1471-2334-6-161 (2006).
- 988 76 Mordecai, E. A. *et al.* Optimal temperature for malaria transmission is dramatically lower than  
989 previously predicted. *Ecol. Lett.* **16**, 22-30, doi:10.1111/ele.12015 (2013).



- 990 77 Shapiro, L. L. M., Murdock, C. C., Jacobs, G. R., Thomas, R. J. & Thomas, M. B. Larval food  
991 quantity affects the capacity of adult mosquitoes to transmit human malaria. *Proceedings of the*  
992 *Royal Society B-Biological Sciences* **283**, doi:10.1098/rspb.2016.0298 (2016).
- 993 78 Parton, W. J. & Logan, J. A. A model for diurnal-variation in soil and air-temperature.  
994 *Agricultural Meteorology* **23**, 205-216, doi:10.1016/0002-1571(81)90105-9 (1981).
- 995 79 Detinova, T. Age-grouping methods in Diptera of medical importance with special reference to  
996 some vectors of malaria. *World Health Organization monograph series* **47**, 13-91 (1962).
- 997 80 Huho, B. *et al.* Consistently high estimates for the proportion of human exposure to malaria  
998 vector populations occurring indoors in rural Africa. *Int. J. Epidemiol.* **42**, 235-247,  
999 doi:10.1093/ije/dys214 (2013).
- 1000 81 Wat'senga, F. *et al.* Nationwide insecticide resistance status and biting behaviour of malaria  
1001 vector species in the Democratic Republic of Congo. *Malar. J.* **17**, doi:10.1186/s12936-018-  
1002 2285-6 (2018).
- 1003 82 Reddy, M. R. *et al.* Outdoor host seeking behaviour of *Anopheles gambiae* mosquitoes following  
1004 initiation of malaria vector control on Bioko Island, Equatorial Guinea. *Malar. J.* **10**,  
1005 doi:10.1186/1475-2875-10-184 (2011).
- 1006 83 Cooke, M. K. *et al.* 'A bite before bed': exposure to malaria vectors outside the times of net use in  
1007 the highlands of western Kenya. *Malar. J.* **14**, doi:10.1186/s12936-015-0766-4 (2015).
- 1008 84 West, B., Welch, K. & Galecki, A. *Linear mixed models: a practical guide using statistical*  
1009 *software*. 2nd edn, (Chapman & Hall, 2007).
- 1010 85 Gill, J. & King, G. What to do when your hessian is not invertible: alternatives to model  
1011 respecification in nonlinear estimation. *Sociological Methods & Research* **33**, 54-87,  
1012 doi:doi.org/10.1177/0049124103262681 (2004).
- 1013  
1014

1015 **Acknowledgements**

1016 We thank Deonna C. Soergel, Janet L. Teeple, and Fhallon Ware-Gilmore for technical assistance, and  
1017 David A. Kennedy, Eleanore D. Sternberg and Lizhao Ge for advice on statistical analyses. This study  
1018 was supported by NIH NIAID grant # R01AI110793 and National Science Foundation Ecology and  
1019 Evolution of Infectious Diseases grant (DEB-1518681). The funders had no role in study design, data  
1020 collection and analysis, decision to publish, or preparation of the manuscript.

1021

1022 **Author contributions**

1023 E.S., J.L.W., E.S.S., T.S.C., and M.B.T. designed research; E.S., J.L.W., N.L.D. and E.S.S. performed  
1024 research; E.S., M.K.G., E.S.S., and T.S.C. analysed data; and E.S., E.S.S., T.S.C., and M.B.T. wrote the  
1025 manuscript with inputs from M.K.G., J.L.W, and N.L.D.

1026

1027 **Competing interests**

1028 The authors declare no competing interests.

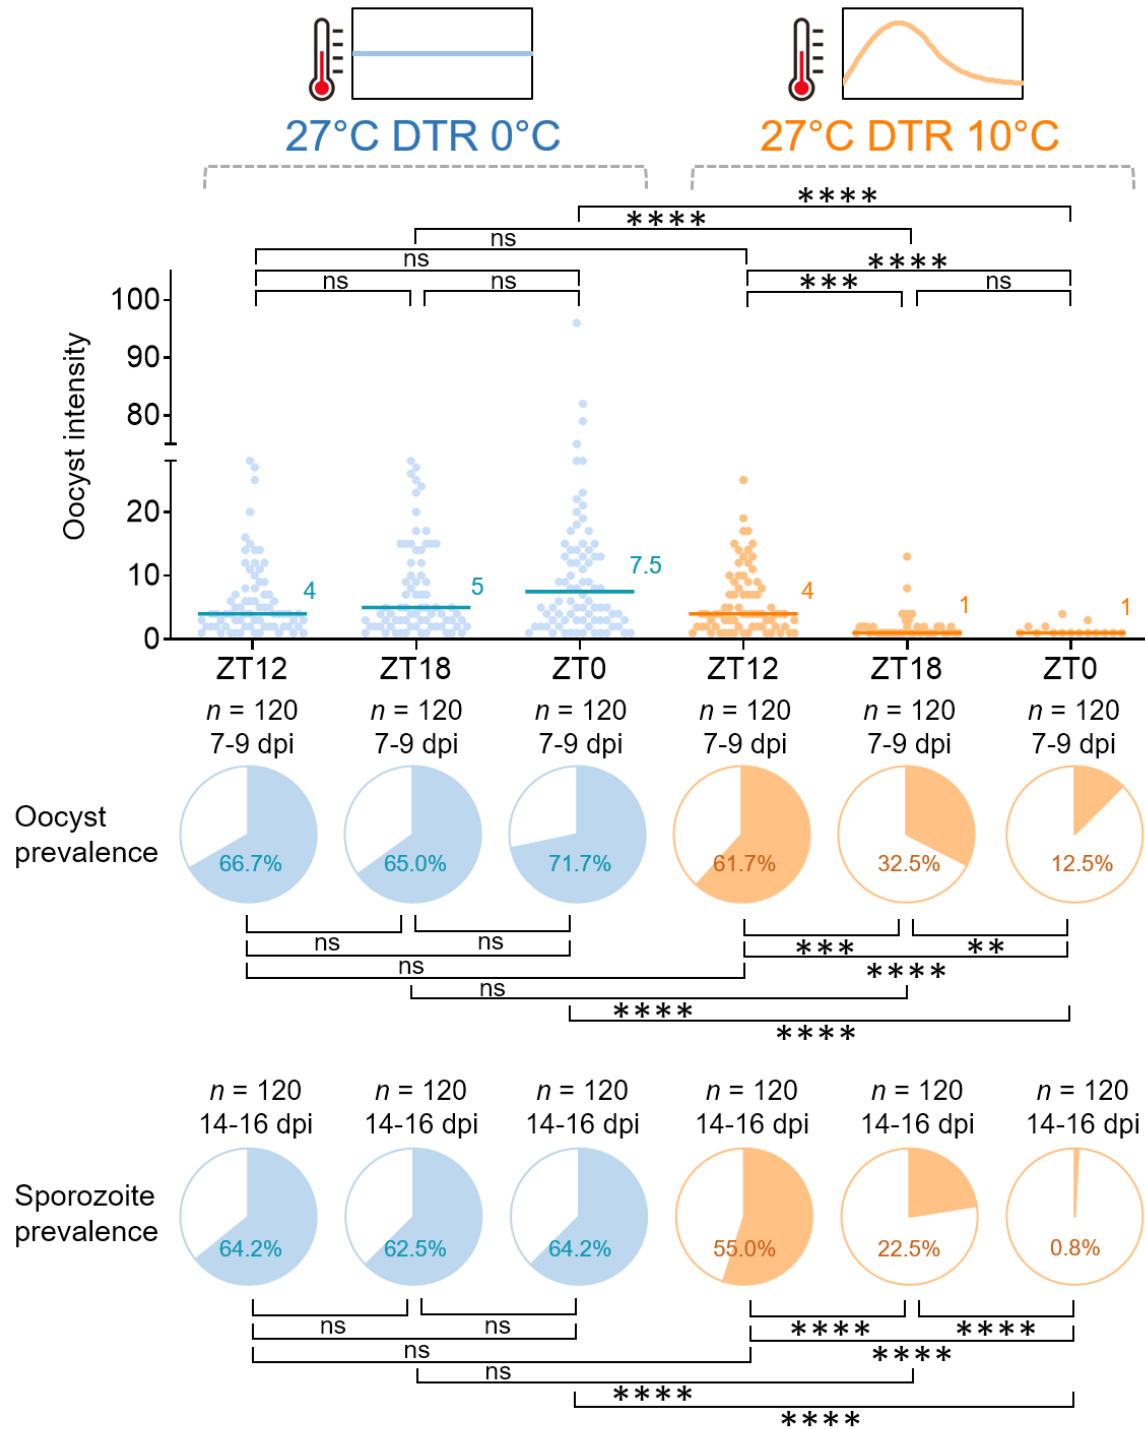

1029

1030 **Figure 1. Effects of time-of-day of blood meal and diurnal temperature fluctuation on vector**  
 1031 **competence of *A. gambiae* mosquitoes infected with *P. falciparum* malaria.** Mosquitoes were offered  
 1032 infected blood meals at a different time-of-day (18:00h [ZT12], 00:00h [ZT18], or 06:00h [ZT0]) and

1033 kept under either constant (i.e. 27°C with a Diurnal Temperature Range [DTR] of 0°C) or fluctuating (i.e.  
1034 27°C with a DTR of 10°C) temperature regimes. There is no effect of time-of-day of blood feeding on  
1035 vector competence (oocyst or sporozoite prevalence) under constant temperature conditions but a  
1036 significant increase in competence for mosquitoes feeding in the evening (18:00h; ZT12) and a significant  
1037 reduction in competence for those feeding in the morning (06:00h; ZT0), relative to those feeding at  
1038 midnight (00:00h; ZT18) under realistic fluctuating temperatures. The scatter plots show oocyst intensity,  
1039 with the data points representing the number of oocysts found in infected individual mosquitoes, and the  
1040 horizontal lines the median. The pie charts show oocyst or sporozoite prevalence calculated as the  
1041 proportion of infected mosquitoes revealed by dissection of midguts and salivary glands, respectively.  
1042 Asterisks indicate statistically significant differences between treatments (\*\*  $P < 0.01$ , \*\*\*  $P < 0.001$ ,  
1043 \*\*\*\*  $P < 0.0001$ ; ns, not significant at  $P = 0.05$ ;  $P$ -values were Bonferroni corrected after pairwise  
1044 comparisons).  $n$  indicates the number of mosquitoes sampled from four replicate containers of mosquitoes  
1045 from two biologically replicated infection experiments. Forty mosquitoes were sampled daily from four  
1046 replicate containers (10 per container) for dissecting midguts on 7-9 days post infection (dpi) or salivary  
1047 glands on 14-16 dpi. Further details of the analysis are reported in Supplementary Table 3.

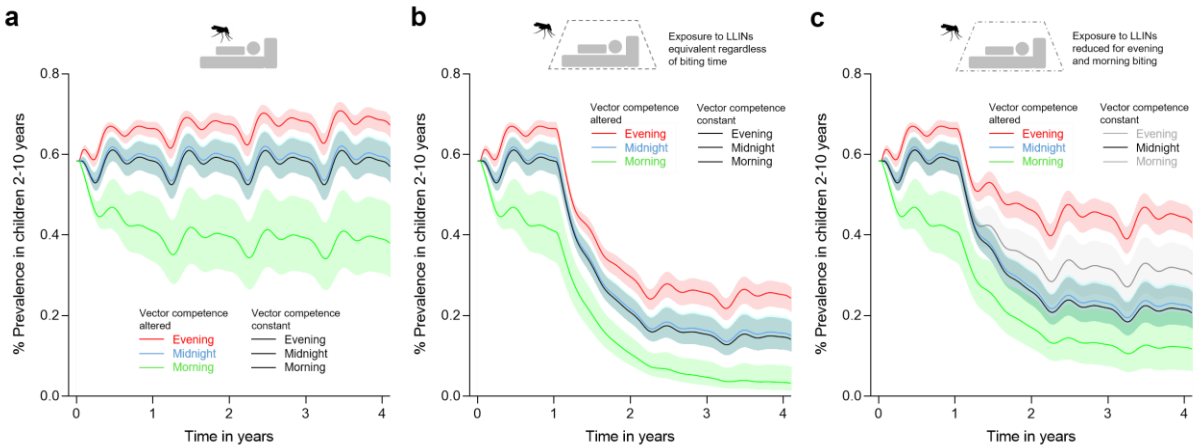

1048

1049 **Figure 2. Model outputs illustrating potential epidemiological significance of altered vector**  
1050 **competence. a**, Effect of altered vector competence on malaria prevalence in children in a high  
1051 transmission setting with mosquitoes biting predominantly in the evening (red line, run 2 and 5 in  
1052 Supplementary Table 6), at midnight (blue line, run 1 and 4 in Supplementary Table 6) or in the morning  
1053 (green line, run 3 and 6 in Supplementary Table 6) in the absence of bed nets (LLINs). In these and  
1054 subsequent figures the solid lines represent the means and the matching coloured bands, the 95%  
1055 confidence intervals. The black line shows the control scenarios where, in line with conventional  
1056 assumptions, competence is the same for all mosquitoes (run 7-12 in Supplementary Table 6). In these  
1057 cases of constant vector competence, prevalence is identical regardless of biting time. If we allow  
1058 competence to vary in line with our empirical data (i.e. high for evening biters, intermediate for midnight  
1059 biters and low for morning biters), there is little effect on prevalence if mosquitoes bite predominantly at  
1060 midnight. However, variation in competence leads to increased infection prevalence when feeding  
1061 patterns are skewed towards evening biting, and reduced prevalence when skewed towards morning  
1062 biting. **b**, Impact of LLINs on malaria prevalence when mosquitoes bite predominantly in the evening, at  
1063 midnight, or in the morning either with altered (evening = red line, midnight = blue line, morning = green  
1064 line, run 1 – 3 in Supplementary Table 6) or constant (evening, midnight, and morning = black line, run 7  
1065 – 9 in Supplementary Table 6) vector competence, assuming all mosquitoes have equal probability of  
1066 contacting an LLIN (i.e. the impact of LLINs on mosquito mortality and transmission potential does not

1067 vary with biting time). Under these assumptions, LLINs lead to reduced overall infection prevalence, but  
1068 the efficacy of LLINs is less if biting is skewed towards the evening relative to midnight or morning  
1069 biting, as evening biters have the greatest vector competence and hence, higher overall transmission  
1070 potential. **c**, Impact of LLINs on malaria prevalence when mosquitoes bite predominantly in the evening,  
1071 at midnight, or in the morning either with altered (evening = red line, midnight = blue line, morning =  
1072 green line, run 4 – 6 in Supplementary Table 6) or constant (evening and morning = black line, midnight  
1073 = grey line, run 10 – 12 in Supplementary Table 6) vector competence, but assuming that mosquitoes  
1074 feeding in the evening or morning have reduced contact with LLINs (either because they feed outdoors or  
1075 because people are less likely to be in bed and using nets at these times). Under these assumptions the  
1076 relative efficacy of LLINs is reduced, but most markedly when feeding is dominated by evening biting  
1077 mosquitoes with highest vector competence.

1078

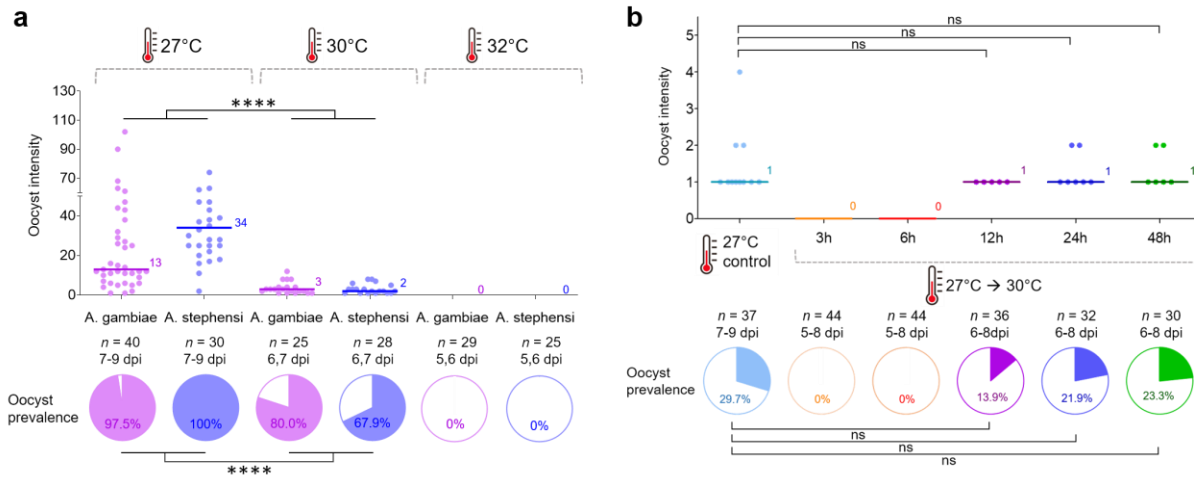

1079

1080 **Figure 3. Effect of exposure to high temperatures on vector competence of *Anopheles* mosquitoes**  
 1081 **infected with *P. falciparum* malaria. a,** *A. gambiae* and *A. stephensi* mosquitoes were kept at 27°C,  
 1082 30°C, or 32°C following an infectious blood meal. The data indicate that exposure to constant 30°C is  
 1083 detrimental to parasite establishment for both *A. gambiae* and *A. stephensi*, while the infection is  
 1084 eliminated at 32°C. Results of analyses to examine the effects of temperature treatment and mosquito  
 1085 species on oocyst intensity or prevalence are reported in Supplementary Table 7. Asterisks indicate  
 1086 statistically significant differences between treatment groups (\*\*\*\*  $P < 0.0001$ ). **b,** *A. stephensi*  
 1087 mosquitoes were incubated at 27°C for various periods of time ranging from 3 to 48h following an  
 1088 infectious blood meal, before being transferred to 30°C. Control mosquitoes were kept at 27°C  
 1089 throughout. These data indicate that the probability of parasite establishment in the mosquito increases as  
 1090 the time spent at a permissive temperature (27°C) increases, and that parasites are most sensitive to high  
 1091 temperatures during the first 12-24h following blood feeding. The control group was compared with each  
 1092 treatment group with  $> 0$  infection using GLM with pairwise post-hoc contrasts followed Bonferroni  
 1093 corrections for  $P$ -values (ns, not significant at  $P = 0.05$ ). For (a) and (b), the scatter plots show oocyst  
 1094 intensity, with the data points representing the number of oocysts found in individual mosquitoes, and the  
 1095 horizontal lines the median. The pie charts show oocyst or sporozoite prevalence calculated as the

- 1096 proportion of infected mosquitoes revealed by dissection of midguts and salivary glands, respectively.  $n$
- 1097 indicates the number of mosquitoes sampled per treatment group (dpi = days post infection).



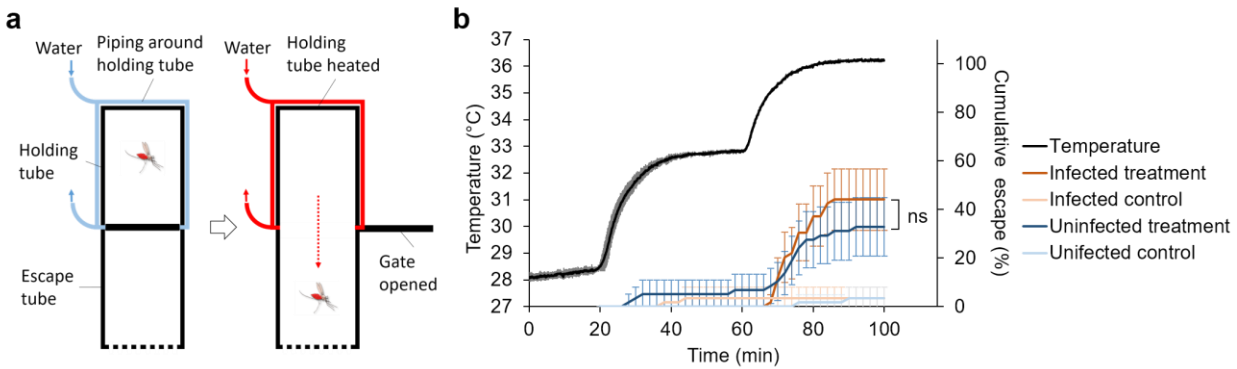

1098

1099 **Figure 4. Behavioural assay to investigate thermal avoidance behaviour of *A. gambiae* mosquitoes**

1100 **following a blood meal. a,** Diagram of the behavioural assay. The apparatus comprises two clear Perspex

1101 tubes joined by a sliding gate. One tube (the holding tube) is wrapped in plastic piping through which

1102 water is circulated. Infected or uninfected blood-fed mosquitoes (blood fed at 06:00h [ZT0]) are

1103 introduced into the holding tube and after a period of acclimation, the water is gradually heated from 28-

1104 36°C, and the sliding gate opened. The rate at which the mosquitoes leave the holding tube and enter the

1105 adjacent escape tube is recorded. For a control, the water is maintained at constant 28°C to measure

1106 baseline movement rates across the assay period for both infected and uninfected mosquitoes. **b,**

1107 Cumulative escape rate of infected and uninfected *A. gambiae* mosquitoes (error bars = 95% confidence

1108 intervals) in relation to temperature in the holding tube. The black line shows mean temperature with

1109 standard deviation (grey lines) in the holding tube in the ramping temperature treatment from three

1110 replicate runs. There were six replicates in total for each of the four mosquito groups (infected or

1111 uninfected, with either ramping temperature or constant temperature). The data reveal that mosquitoes

1112 were unresponsive to temperatures around 33°C, and only exhibited strong escape responses as

1113 temperatures was ramped up to 35°C and beyond. Control mosquitoes showed negligible movement

1114 across the assay period. These patterns were consistent whether mosquitoes had taken an infected or

1115 uninfected blood meal. Log-rank test was used to compare escape probability between the treatment

1116 groups (ns, not significant at  $P = 0.05$ ).
